1 **Ozone exposure upregulates the expression of host susceptibility protein TMPRSS2 to SARS-CoV-2**

2

3

4 **Authors:** Thao Vo<sup>a\*</sup>, Kshitiz Paudel<sup>1\*</sup>, Ishita Choudhary<sup>a\*</sup>, Sonika Patial<sup>a</sup>, Yogesh Saini<sup>a,1</sup>

5

6 **Author's Affiliations:** <sup>a</sup>Department of Comparative Biomedical Sciences, School of Veterinary Medicine,  
7 Louisiana State University, Baton Rouge, LA 70803, USA

8 \*These authors contributed equally to this research.

9

10

11 <sup>1</sup>**Corresponding author:**

12 *Yogesh Saini, BVSc & AH, MVSc, PhD*

13 Department of Comparative Biomedical Sciences,

14 School of Veterinary Medicine, Louisiana State University,

15 1909 Skip Bertman Drive,

16 Baton Rouge, LA 70803, USA

17 Phone: 225-578-9143

18 Fax: 225-578-9895

19 E-mail: [ysaini@lsu.edu](mailto:ysaini@lsu.edu)

20

21

22 **Keywords:** Ozone; lung; SARS-CoV-2; host susceptibility; TMPRSS2

23

24 **Running Head:** TMPRSS2 expression in ozone-exposed lungs

25

26

27 **Funding:** This work was supported by the National Institute of Environmental Health Sciences  
28 Grant R01ES030125 (to Y.S.).

29

30 **Disclosures:** The authors have no conflicts of interest to disclose.

31

32

33

34

35  
36  
37  
38  
39  
40  
41  
42  
43  
44  
45  
46  
47  
48  
49  
50  
51  
52  
53  
54  
55  
56  
57  
58  
59  
60  
61  
62  
63  
64  
65  
66  
67  
68

**Abstract:**

**Background:** SARS-CoV-2, a novel coronavirus, and the etiologic agent for the current global health emergency, causes acute infection of the respiratory tract leading to severe disease and significant mortality. Ever since the start of SARS-CoV-2, also known as COVID-19 pandemic, countless uncertainties have been revolving around the pathogenesis and epidemiology of the SARS-CoV-2 infection. While air pollution has been shown to be strongly correlated to increased SARS-CoV-2 morbidity and mortality, whether environmental pollutants such as ground level ozone affects the susceptibility of individuals to SARS-CoV-2 is not yet established.

**Objective:** To investigate the impact of ozone inhalation on the expression levels of signatures associated with host susceptibility to SARS-CoV-2.

**Methods:** We analyzed lung tissues collected from mice that were sub-chronically exposed to air or 0.8ppm ozone for three weeks (4h/night, 5 nights/week), and analyzed the expression of signatures associated with host susceptibility to SARS-CoV-2.

**Results:** SARS-CoV-2 entry into the host cells requires proteolytic priming by the host-derived protease, transmembrane protease serine 2 (TMPRSS2). The TMPRSS2 protein and *Tmprss2* transcripts were significantly elevated in the extrapulmonary airways, parenchyma, and alveolar macrophages from ozone-exposed mice. A significant proportion of additional known SARS-CoV-2 host susceptibility genes were upregulated in alveolar macrophages and parenchyma from ozone-exposed mice.

**Conclusions:** Our data indicate that the unhealthy levels of ozone in the environment may predispose individuals to severe SARS-CoV-2 infection. Given the severity of this pandemic, and the challenges associated with direct testing of host-environment interactions in clinical settings, we believe that this mice-ozone-exposure based study informs the scientific community of the potentially detrimental effects of the ambient ozone levels determining the host susceptibility to SARS-CoV-2.

69 **Introduction:**

70 SARS-CoV-2, a novel coronavirus, and an etiologic agent of the current global health emergency, causes  
71 acute infection of the respiratory tract leading to severe disease and significant mortality<sup>1</sup>. SARS-CoV-2  
72 entry into the host cells is dependent upon the binding of the viral spike (S) protein to the host cellular  
73 receptor, angiotensin converting enzyme (ACE2), and its proteolytic priming by the host-derived protease,  
74 transmembrane protease serine 2 (TMPRSS2)<sup>2</sup>. Therefore, the host susceptibility to SARS-CoV-2 could  
75 vary based on the expression of the host susceptibility proteins including ACE2 and TMPRSS2<sup>3-5</sup>. For  
76 example, increased expression of the host-derived protease, TMPRSS2, may promote the priming of SARS-  
77 CoV-2, thus resulting in increased infectivity and disease severity. The current literature indicates that  
78 individuals have varied susceptibility to SARS-CoV-2 that may be dependent on age<sup>6, 7</sup>, gender<sup>8</sup>,  
79 underlying comorbidities<sup>9</sup>, and the environmental pollution<sup>10, 11</sup>. However, the list of factors determining  
80 varied susceptibilities of human population to SARS-CoV-2 remains incomplete.

81 Nearly one-third of the United States population lives in areas with unhealthy levels of ozone<sup>12, 13</sup>.  
82 While it is already known that the unhealthy levels of ozone increase the risk for developing  
83 cardiopulmonary health problems<sup>14-20</sup>, it is unclear whether the ambient ozone levels regulate the  
84 expression of host susceptibility proteins to SARS-CoV-2 and, in turn, accounts for the varied  
85 susceptibilities of the human population to SARS-CoV-2. Addressing this critical question is highly  
86 relevant in terms of increasing our mechanistic understanding of the host-air pollution (environment)  
87 interactions underlying the SARS-CoV-2 pathogenesis and epidemiology, and for developing future  
88 preventative and therapeutic strategies.

89 To begin to understand the impact of ozone inhalation on the host susceptibility to SARS-CoV-2,  
90 we analyzed lung tissues collected from mice that were sub-chronically exposed to filtered-air or 0.8ppm  
91 ozone for three weeks (4h/night, 5 nights/week)<sup>21</sup>, and analyzed the expression of gene and protein  
92 signatures associated with host susceptibility to SARS-CoV-2. We used western blotting and  
93 immunohistochemistry for assessing expression levels of TMPRSS2 protein in three different lung tissue  
94 compartments. To determine the RNA levels of *Tmprss2* in a cell-specific manner, in situ gene expression  
95 was assessed for *Tmprss2* gene using RNAscope approach. Finally, the mRNA expression levels of 32  
96 known SARS-CoV-2 host susceptibility genes were assessed in three lung tissue compartments using  
97 RNASeq approach. Our findings indicate that host-environment interaction may modulate the expression  
98 of host susceptibility proteins to SARS-CoV-2 and prime the host to manifest severe respiratory illness  
99 following SARS-CoV-2 infection.

100

101

102

103 **Methods:**

104 **Animal husbandry, experimental design and ozone exposure:** Seven-week-old C57BL/6 mice were  
105 procured from Jackson Laboratory (Bar Harbor, ME). Mice were maintained in individually ventilated, hot-  
106 washed cages on a 12-hour dark/light cycle. Mice were housed in polycarbonate cages and fed a regular  
107 diet and water *ad libitum*. All animal use procedures were performed after approval from the Institutional  
108 Animal Care and Use Committee (IACUC) of the Louisiana State University. Ozone was generated by  
109 ozone generator (TSE Systems, Chesterfield, MO), and the ozone levels were monitored by UV photometric  
110 ozone analyzer (Envia Altech Environment, Geneva, IL). Data acquisition was done through DACO  
111 monitoring software (TSE Systems, Chesterfield, MO). Control mice were kept in chamber supplied by  
112 filtered air (Air). Animals were exposed to ozone (800ppb; 4h/night, 5 nights/week, for 3 weeks) or air.  
113 Further details have been published previously <sup>1</sup>.

114  
115 **Necropsy and tissue harvesting, micro-dissection of the extrapulmonary airways, the parenchyma,  
116 and Purification of airspace macrophages:** Animals were euthanized and tissues were collected for RNA  
117 isolation or histological analyses, as described previously <sup>1</sup>.

118  
119 **Immunohistochemistry for TMPRSS2:** Formalin-fixed, paraffin-embedded 5µm lung sections were used  
120 for immunohistochemical localization of TMPRSS2. Sections were deparaffinized with Xylene and  
121 rehydrated with graded ethanol. Heat-induced antigen-retrieval was performed using a Citrate buffer (pH  
122 6.0). Endogenous peroxidases were quenched with 3% hydrogen peroxide (10 min at room temperature).  
123 After blocking with 3% goat serum for 30 min, sections were incubated for 2h at room temperature with  
124 rabbit polyclonal TMPRSS2 primary antibody (ab214462; Abcam Cambridge, MA). The sections were  
125 then processed using VECTASTAIN Elite ABC HRP Kit (Vector Laboratories, Burlingame, CA), followed  
126 by chromogenic substrate conversion to insoluble colored precipitate using ImmPACT NovaRED HRP  
127 substrate Kit (Vector Laboratories, Burlingame, CA). Sections were counterstained with Gill's  
128 Hematoxylin-I, dehydrated, and coverslipped with mounting media (H-5000, Vector Laboratories,  
129 Burlingame, CA).

130  
131 **Western Blotting for TMPRSS2:** Whole lung homogenates and bronchoalveolar lavage aliquots were  
132 separated by SDS-PAGE (NuPAGE 4-12% Bis-Tris gradient gel; Life Technologies, CA) and transferred  
133 to PVDF membrane. Rabbit polyclonal TMPRSS2 primary antibody (ab214462; Abcam Cambridge, MA)  
134 and mouse monoclonal alpha tubulin (T5168, Sigma-Aldrich, MO) were used. Protein bands were  
135 visualized using secondary antibodies (alexa fluor 680 Goat anti-rabbit IgG or Alexa fluor 800 Goat anti-  
136 mouse IgG) and acquired using Odyssey CLx, Imager (LI-COR, NE) <sup>2</sup>.

137 ***In situ* localization of *Tmprss2* mRNA:** Formalin-fixed paraffin-embedded 5 $\mu$ m lung sections were used  
138 for *in situ* localization of *Tmprss2* mRNA using RNAscope technologies, as reported previously <sup>1,3</sup>.

139

140 **RNA isolation and quality assessment, Construction of sequencing library, RNA sequencing and**

141 **Gene Expression Analyses, and Data Availability:** The detailed methodologies have been previously  
142 published <sup>1</sup>. The raw data have been submitted to the Gene Expression Omnibus (GEO) database. The data  
143 is available via <https://www.ncbi.nlm.nih.gov/geo/query/acc.cgi?acc=GSE156799> .

144

145 **Statistical analyses:** Student's T test for was used to determine significant differences among groups.  
146 Statistical analyses were performed using GraphPad Prism 8.0 (GraphPad Software, La Jolla, CA). All data  
147 were expressed as mean  $\pm$  standard error of the mean (SEM). A *p*-value<0.05 was considered statistically  
148 significant.

149

150

151

152

153

154

155

156

157

158

159

160

161

162

163

164

165

166

167

168

169

170

171 **Results and discussion:**

172           TMPRSS2 is essential for the proteolytic priming of viral spike (S) protein of the SARS-CoV-2  
173 following its binding to host receptor, ACE2. In fact, a recent study elegantly demonstrated that host cell  
174 entry of SARS-CoV-2 can be blocked by a clinically proven inhibitor of TMPRSS2 indicating the critical  
175 importance of TMPRSS2 in determining SARS-CoV-2 infectivity <sup>2</sup>. Therefore, the host susceptibility to  
176 SARS-CoV-2 could vary based on the expression of the host susceptibility proteins including ACE2 and  
177 TMPRSS2 <sup>3-5</sup>. Individuals have varied susceptibility to SARS-CoV-2 that may be dependent on various  
178 factors including air pollution <sup>10, 11</sup>. Air-pollution levels correlate strongly with increased morbidity and  
179 mortality due to SARS-CoV-2 <sup>22-24</sup>. While it is already known that the unhealthy levels of ozone, one of the  
180 6 criteria air pollutants, increase the risk for developing cardiopulmonary health problems <sup>14-20</sup>, it is unclear  
181 whether the ambient ozone regulates the levels of expression of host susceptibility proteins to SARS-CoV-  
182 2 and in turn accounts, in part, for the varied susceptibilities of human population to SARS-CoV-  
183 2. Therefore, we sought to test the hypothesis that ozone induces the expression of TMPRSS2 in lung tissue.

184           As compared to filtered air-exposed mice, the ozone-exposed mice had significantly elevated levels  
185 of TMPRSS2 protein in the whole lung lysate (**Fig 1A**) and the bronchoalveolar lavage fluid (BALF) (**Fig**  
186 **1B**). These results demonstrate that ozone exposure increases the expression of TMPRSS2 protein in the  
187 lungs of mice and that this protein is detectable in the BALF fluid. Next, we performed  
188 immunohistochemical staining on lung sections to visualize cell-specific localization of TMPRSS2.  
189 Interestingly, while the TMPRSS2 staining was evident in the airway epithelium and alveolar macrophages  
190 from filtered air-exposed mice, the staining intensity was remarkably increased in the airway epithelial  
191 cells, alveolar epithelial cells, and alveolar macrophages from ozone-exposed mice (**Fig 1C**). These results  
192 clearly demonstrate that ozone increases the expression of TMPRSS2 in the lung tissue in a cell-specific  
193 manner.

194           In order to test whether TMPRSS2 protein expression correlates with mRNA expression in a cell-  
195 specific manner, we analyzed RNASeq dataset from extrapulmonary airways (**Fig. 2A**), parenchyma (**Fig.**  
196 **2B**), and alveolar macrophages from filtered-air and ozone exposed mice (**Fig. 2C**) for *Tmprss2* transcript  
197 levels. As expected, the fragment per kilo base per million mapped reads (FPKM) for *Tmprss2* were  
198 significantly upregulated in all the three tissue compartments in ozone-exposed as compared to filtered-air  
199 exposed mice. We further confirmed these findings for cell-specificity in ozone-exposed airways and  
200 alveoli using RNAscope-based in situ hybridization. This assay also showed significantly increased signals  
201 for *Tmprss2* transcripts in both the airway epithelial cells and the alveolar epithelial cells of ozone-exposed  
202 compared to filtered-air exposed mice (**Fig. 2D**). These data suggest that the changes in the protein levels  
203 of TMPRSS2 are a result of changes at the level of gene expression indicating that ozone directly or  
204 indirectly differentially regulates the gene expression of *Tmprss2*.

205 Finally, from the RNASeq data, we compared the normalized z-scores of 32 known genes  
206 associated with host susceptibility to SARS-CoV-2. Of the three tissues analyzed, while only four of the  
207 total 32 genes, i.e., *Furin*, *Thop1*, *Ppia*, and *Tmprss2*, were significantly increased in the extrapulmonary  
208 airways of ozone-exposed versus filtered-air exposed mice (**Fig. 3A**); in the lung parenchyma, nearly half  
209 of the host susceptibility genes were upregulated while the rest half were downregulated in ozone-exposed  
210 versus filtered-air exposed mice (**Fig. 3B**). In contrast to the extrapulmonary airways and the lung  
211 parenchyma, a major proportion of the host susceptibility genes including those of *Tmprss2*, *Ace*, *Anpep*,  
212 *Cd4*, and *Ccr5* were significantly upregulated in the CD11b<sup>+</sup> lung macrophages from ozone-exposed versus  
213 filtered-air exposed mice (**Fig. 3C**) indicating a large effect of ozone-exposure on SARS-CoV-2 host  
214 susceptibility genes in CD11b<sup>+</sup> lung macrophages

215 In conclusion, this study suggests a critical role of the host-environment (ozone pollution)  
216 interaction in modulating the susceptibility of the human population to SARS-CoV-2. Since TMPRSS2 is  
217 essential for the proteolytic processing of several coronaviruses including SARS-CoV-1, MERS, as well as  
218 influenza A virus<sup>25, 26</sup>, our findings have implications beyond SARS-CoV-2 infections. Taken together,  
219 this study presents a novel finding that will have significant and immediate impact on our understanding of  
220 the pathogenesis and epidemiology of SARS-CoV-2 pandemic.

221  
222  
223  
224  
225  
226  
227  
228  
229  
230  
231  
232  
233  
234  
235  
236  
237  
238

239 **Acknowledgments**

240 We thank Sherry Ring for assistance with histological tissue processing.

241

242 **Author Contributions**

243 Y.S. and S.P. conceived and designed the research; T.V. performed the RNA in situ hybridization assays;

244 K.P. performed the immunohistochemical staining; I.C. performed immunoblotting assays. Y. S., T.V.,

245 K.P., and I.C., maintained the animal colony, performed ozone-exposures, and conducted animal

246 necropsies. S.P. and Y.S. analyzed the histopathological, immunohistochemical, and RNA in situ

247 hybridization data and wrote and reviewed the manuscript for intellectual contents.

248

249

250

251

252

253

254

255

256

257

258

259

260

261

262

263

264

265

266

267

268

269

270

271

272



273 **References**

274

- 275 [1] Huang C, Wang Y, Li X, Ren L, Zhao J, Hu Y, Zhang L, Fan G, Xu J, Gu X, Cheng Z, Yu T, Xia J,  
276 Wei Y, Wu W, Xie X, Yin W, Li H, Liu M, Xiao Y, Gao H, Guo L, Xie J, Wang G, Jiang R, Gao Z, Jin Q,  
277 Wang J, Cao B: Clinical features of patients infected with 2019 novel coronavirus in Wuhan,  
278 China. *Lancet* 2020, 395:497-506.
- 279 [2] Hoffmann M, Kleine-Weber H, Schroeder S, Kruger N, Herrler T, Erichsen S, Schiergens TS,  
280 Herrler G, Wu NH, Nitsche A, Muller MA, Drosten C, Pohlmann S: SARS-CoV-2 Cell Entry  
281 Depends on ACE2 and TMPRSS2 and Is Blocked by a Clinically Proven Protease Inhibitor. *Cell*  
282 2020, 181:271-80 e8.
- 283 [3] Ragia G, Manolopoulos VG: Inhibition of SARS-CoV-2 entry through the ACE2/TMPRSS2  
284 pathway: a promising approach for uncovering early COVID-19 drug therapies. *Eur J Clin*  
285 *Pharmacol* 2020.
- 286 [4] Chatterjee SK, Saha S, Munoz MNM: Molecular Pathogenesis, Immunopathogenesis and  
287 Novel Therapeutic Strategy Against COVID-19. *Front Mol Biosci* 2020, 7:196.
- 288 [5] Bradding P, Richardson M, Hinks TSC, Howarth PH, Choy DF, Arron JR, Wenzel SE, Siddiqui S:  
289 ACE2, TMPRSS2, and furin gene expression in the airways of people with asthma-implications  
290 for COVID-19. *J Allergy Clin Immunol* 2020, 146:208-11.
- 291 [6] Lingappan K, Karmouty-Quintana H, Davies J, Akkanti B, Harting MT: Understanding the age  
292 divide in COVID-19: why are children overwhelmingly spared? *Am J Physiol Lung Cell Mol*  
293 *Physiol* 2020, 319:L39-L44.
- 294 [7] Inde Z, Yapp C, Joshi GN, Spetz J, Fraser C, Deskin B, Ghelfi E, Sodhi C, Hackam D, Kobzik L,  
295 Croker B, Brownfield D, Jia H, Sarosiek KA: Age-dependent regulation of SARS-CoV-2 cell entry  
296 genes and cell death programs correlates with COVID-19 disease severity. *bioRxiv* 2020.
- 297 [8] Di Stadio A, Della Volpe A, Ralli M, Ricci G: Gender differences in COVID-19 infection. The  
298 estrogen effect on upper and lower airways. Can it help to figure out a treatment? *Eur Rev Med*  
299 *Pharmacol Sci* 2020, 24:5195-6.
- 300 [9] Sanyaolu A, Okorie C, Marinkovic A, Patidar R, Younis K, Desai P, Hosein Z, Padda I, Mangat J,  
301 Altaf M: Comorbidity and its Impact on Patients with COVID-19. *SN Compr Clin Med* 2020:1-8.
- 302 [10] Wu X, Nethery RC, Sabath BM, Braun D, Dominici F: Exposure to air pollution and COVID-19  
303 mortality in the United States: A nationwide cross-sectional study. *medRxiv* 2020.
- 304 [11] Liang D, Shi L, Zhao J, Liu P, Sarnat JA, Gao S, Schwartz J, Liu Y, Ebelt ST, Scovronick N,  
305 Chang HH: Urban Air Pollution May Enhance COVID-19 Case-Fatality and Mortality Rates in the  
306 United States. *Innovation (N Y)* 2020:100047.
- 307 [12] Lange SS, Mulholland SE, Honeycutt ME: What Are the Net Benefits of Reducing the Ozone  
308 Standard to 65 ppb? An Alternative Analysis. *Int J Environ Res Public Health* 2018, 15.
- 309 [13] Dionisio KL, Nolte CG, Spero TL, Graham S, Caraway N, Foley KM, Isaacs KK: Characterizing  
310 the impact of projected changes in climate and air quality on human exposures to ozone. *J Expo*  
311 *Sci Environ Epidemiol* 2017, 27:260-70.
- 312 [14] Raza A, Dahlquist M, Jonsson M, Hollenberg J, Svensson L, Lind T, Ljungman PLS: Ozone and  
313 cardiac arrest: The role of previous hospitalizations. *Environ Pollut* 2019, 245:1-8.
- 314 [15] Li H, Wu S, Pan L, Xu J, Shan J, Yang X, Dong W, Deng F, Chen Y, Shima M, Guo X: Short-  
315 term effects of various ozone metrics on cardiopulmonary function in chronic obstructive

316 pulmonary disease patients: Results from a panel study in Beijing, China. *Environ Pollut* 2018,  
317 232:358-66.

318 [16] Koman PD, Mancuso P: Ozone Exposure, Cardiopulmonary Health, and Obesity: A  
319 Substantive Review. *Chem Res Toxicol* 2017, 30:1384-95.

320 [17] Dye JA, Ledbetter AD, Schladweiler MC, Costa DL, Kodavanti UP: Whole body  
321 plethysmography reveals differential ventilatory responses to ozone in rat models of  
322 cardiovascular disease. *Inhal Toxicol* 2015, 27 Suppl 1:14-25.

323 [18] Dye JA, Costa DL, Kodavanti UP: Executive Summary: variation in susceptibility to ozone-  
324 induced health effects in rodent models of cardiometabolic disease. *Inhal Toxicol* 2015, 27  
325 Suppl 1:105-15.

326 [19] Day DB, Xiang J, Mo J, Li F, Chung M, Gong J, Weschler CJ, Ohman-Strickland PA, Sundell J,  
327 Weng W, Zhang Y, Zhang JJ: Association of Ozone Exposure With Cardiorespiratory  
328 Pathophysiologic Mechanisms in Healthy Adults. *JAMA Intern Med* 2017, 177:1344-53.

329 [20] Balmes JR: Long-Term Exposure to Ozone and Cardiopulmonary Mortality: Epidemiology  
330 Strikes Again. *Am J Respir Crit Care Med* 2019, 200:958-9.

331 [21] Choudhary I, Vo T, Paudel K, Patial S, Saini Y: Compartment-specific transcriptomics of  
332 ozone-exposed murine lungs reveals sex and cell type-associated perturbations relevant to  
333 mucoinflammatory lung diseases. *Am J Physiol Lung Cell Mol Physiol* 2020.

334 [22] Woodby B, Arnold MM, Valacchi G: SARS-CoV-2 infection, COVID-19 pathogenesis, and  
335 exposure to air pollution: What is the connection? *Ann N Y Acad Sci* 2020.

336 [23] Villeneuve PJ, Goldberg MS: Methodological Considerations for Epidemiological Studies of  
337 Air Pollution and the SARS and COVID-19 Coronavirus Outbreaks. *Environ Health Perspect* 2020,  
338 128:95001.

339 [24] Domingo JL, Marques M, Rovira J: Influence of airborne transmission of SARS-CoV-2 on  
340 COVID-19 pandemic. A review. *Environ Res* 2020, 188:109861.

341 [25] Hatesuer B, Bertram S, Mehnert N, Bahgat MM, Nelson PS, Pohlmann S, Schughart K:  
342 Tmprss2 is essential for influenza H1N1 virus pathogenesis in mice. *PLoS Pathog* 2013,  
343 9:e1003774.

344 [26] Iwata-Yoshikawa N, Okamura T, Shimizu Y, Hasegawa H, Takeda M, Nagata N: TMPRSS2  
345 Contributes to Virus Spread and Immunopathology in the Airways of Murine Models after  
346 Coronavirus Infection. *J Virol* 2019, 93.

347

348

349

350

351

352

353

354

355

356

357 **Figure Legends:**

358 **Figure 1. TMPRSS2 protein expression is upregulated in the lungs of ozone exposed mice:** (A) Western  
359 blot analyses [Bar Graph (above), and representative gel image (below) showing bands for TMPRSS2 protein  
360 and Tubulin loading control] on the whole lung homogenate from Air- and Ozone-exposed mice (n=6-8). (B)  
361 Western blot analyses [Bar Graph (above), and representative gel image (below) showing bands for TMPRSS2  
362 protein] on the equal volumes (loading control) of bronchoalveolar lavage fluid from Air- and Ozone-exposed  
363 mice (n=5). The data are expressed as means ( $\pm$ SEM). Student's T-Test \*\*\*\*  $P<0.0001$ . (C)  
364 Immunohistochemical staining for TMPRSS2 in macrophages (solid red arrow), alveolar epithelial cells (solid  
365 green arrow), and bronchiolar epithelial cells (solid Purple arrow). Negatively stained cells are indicated by  
366 dotted arrows in lung sections that were incubated with antibody (IgG) control. All images were captured at  
367 the same magnification.

368 **Figure 2. *Tmprss2* mRNA expression is upregulated in the lungs of ozone exposed mice:** FPKM values  
369 obtained from RNAseq data set obtained from airways (A), parenchyma (B), and alveolar macrophages (C)  
370 were used to quantify relative expression levels of *Tmprss2* mRNA in air- versus ozone-exposed mice (n=8).  
371 The data are expressed as means ( $\pm$ SEM). Student's T-Test \*\*\*\*  $P<0.0001$ . (D) RNAscope-based in situ  
372 hybridization for *Tmprss2* transcripts (green dots representing punctate staining for *Tmprss2* mRNA in airway  
373 epithelial cells (Top) and alveolar epithelial cells (bottom) in air- (left) and ozone-exposed (right) mice. All  
374 images were captured at the same magnification.

375  
376 **Figure 3.** Heatmap depicting normalized gene expression values (Z-scores) of genes associated with SARS-  
377 CoV-2 host susceptibility in airways (A), parenchyma (B), and alveolar macrophages (C) from air- and ozone-  
378 exposed mice.

379

380

381

382

383

384

385

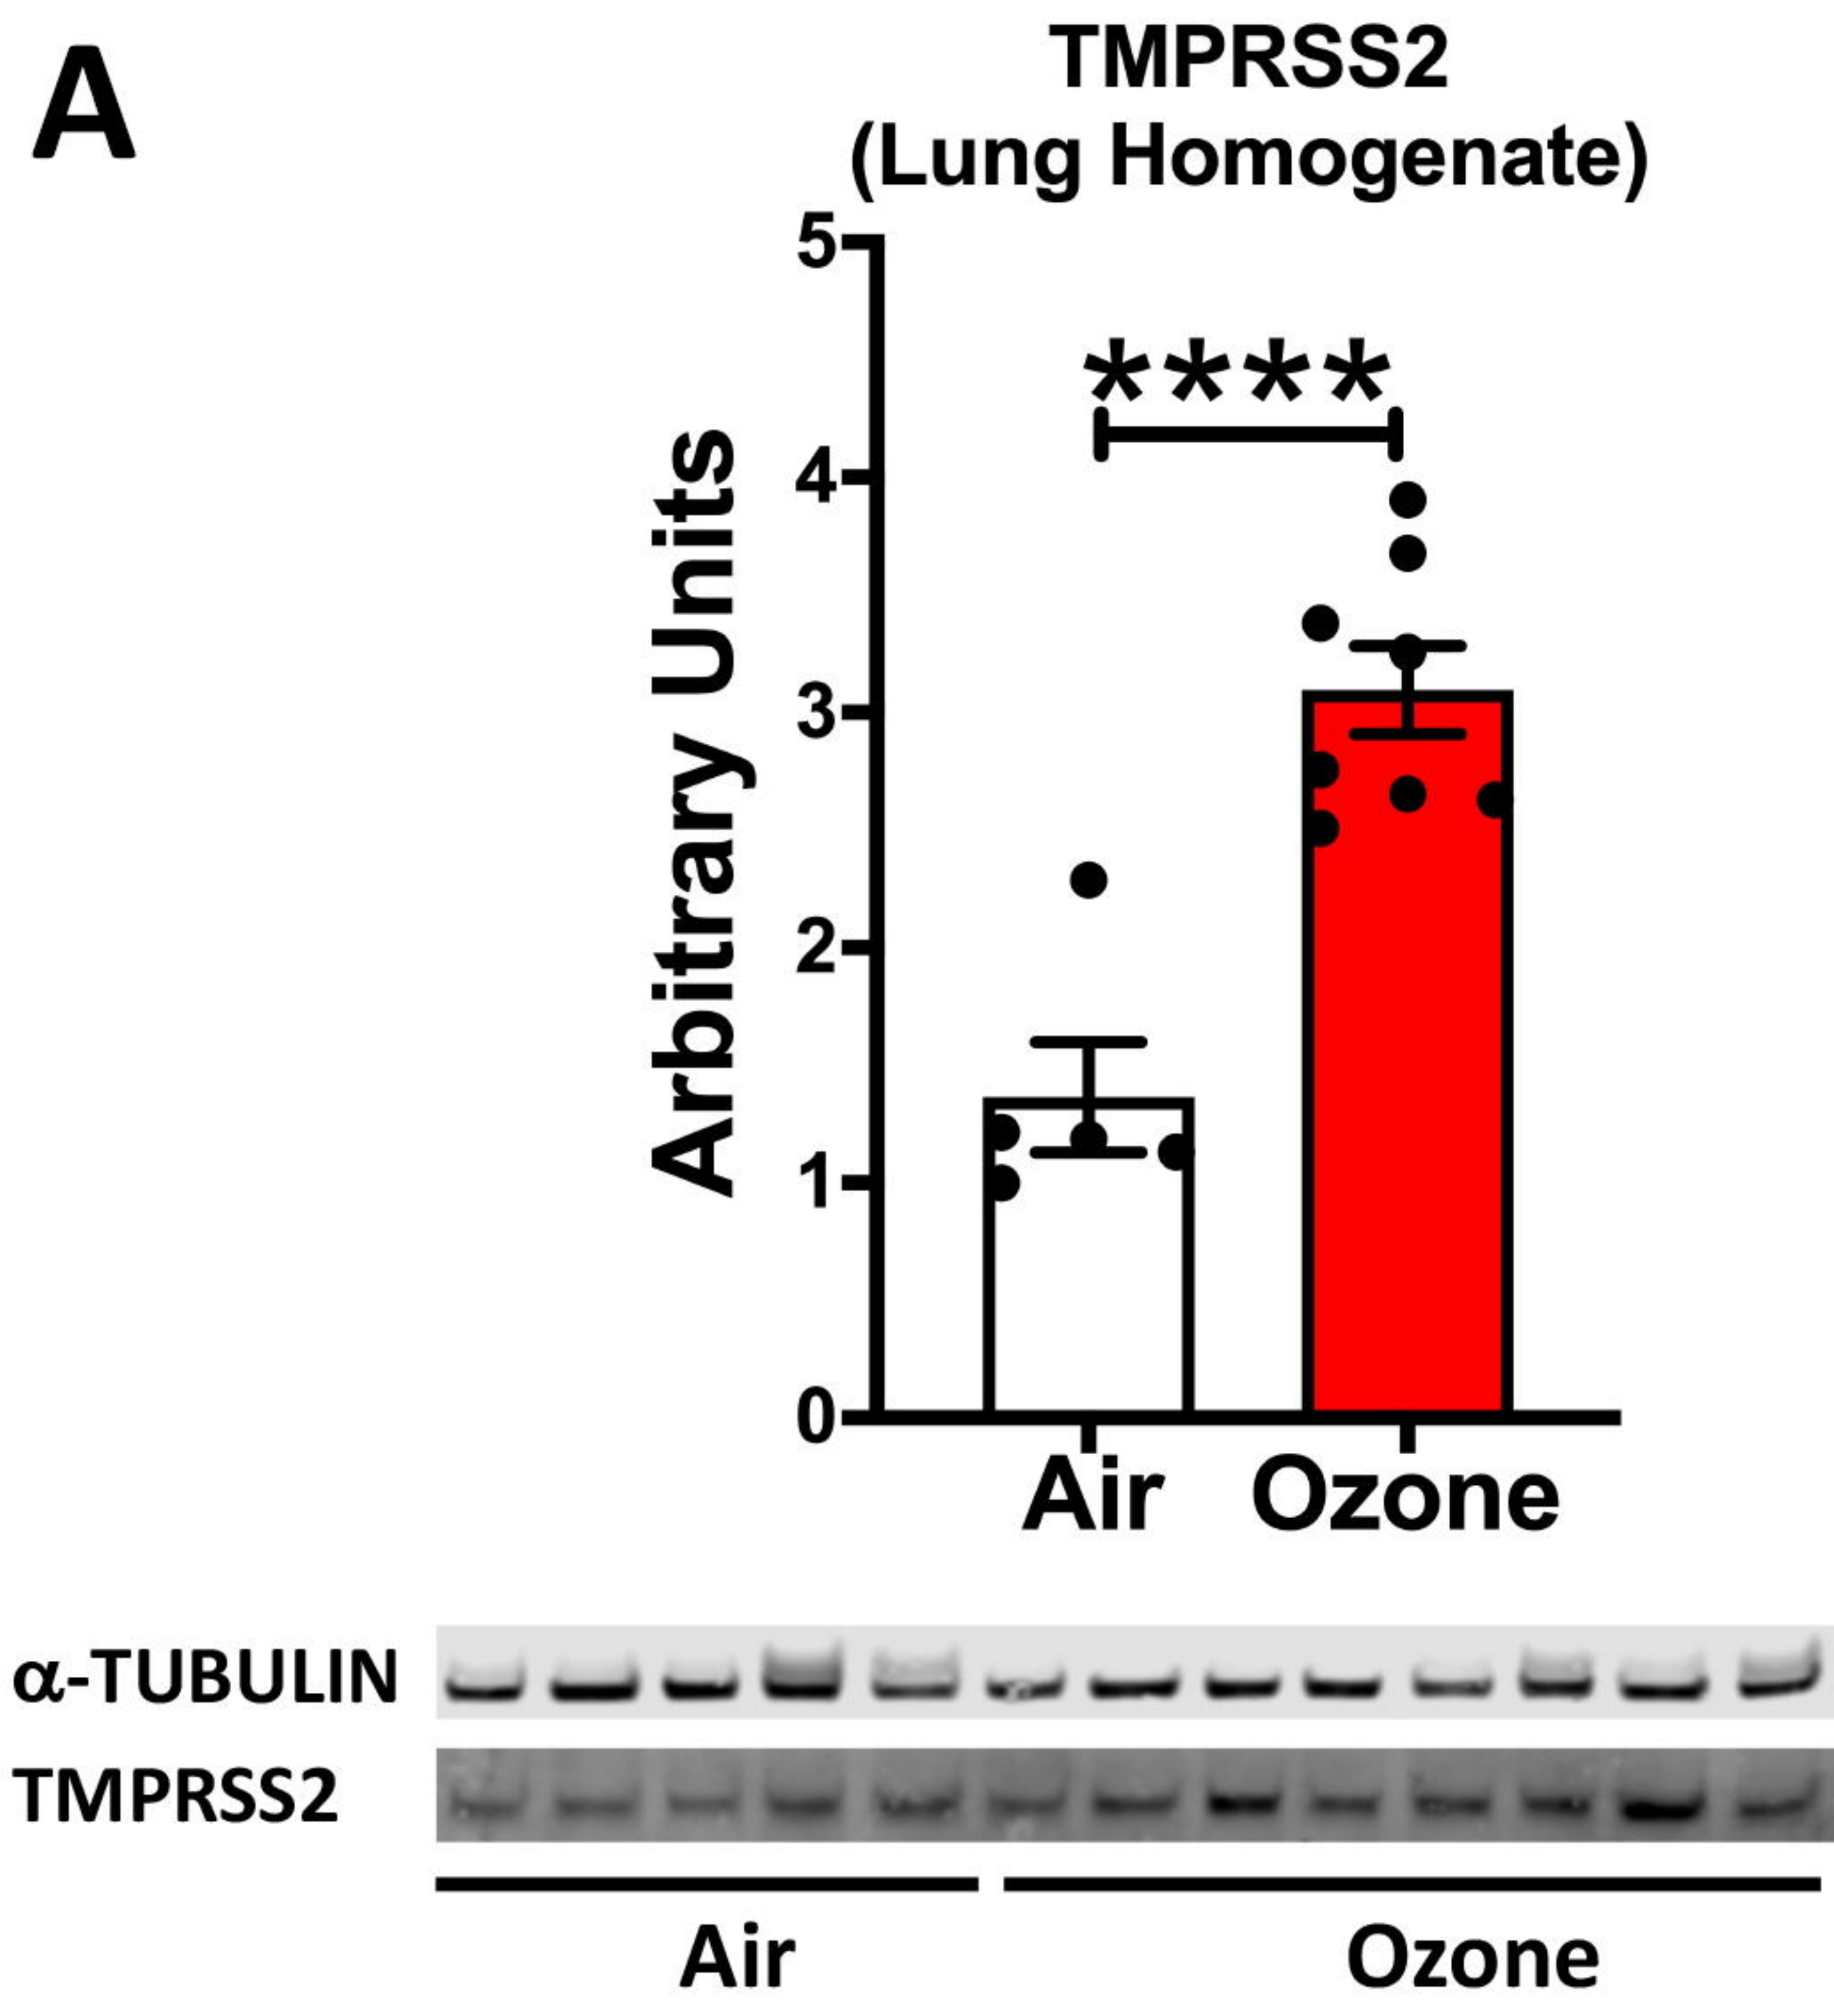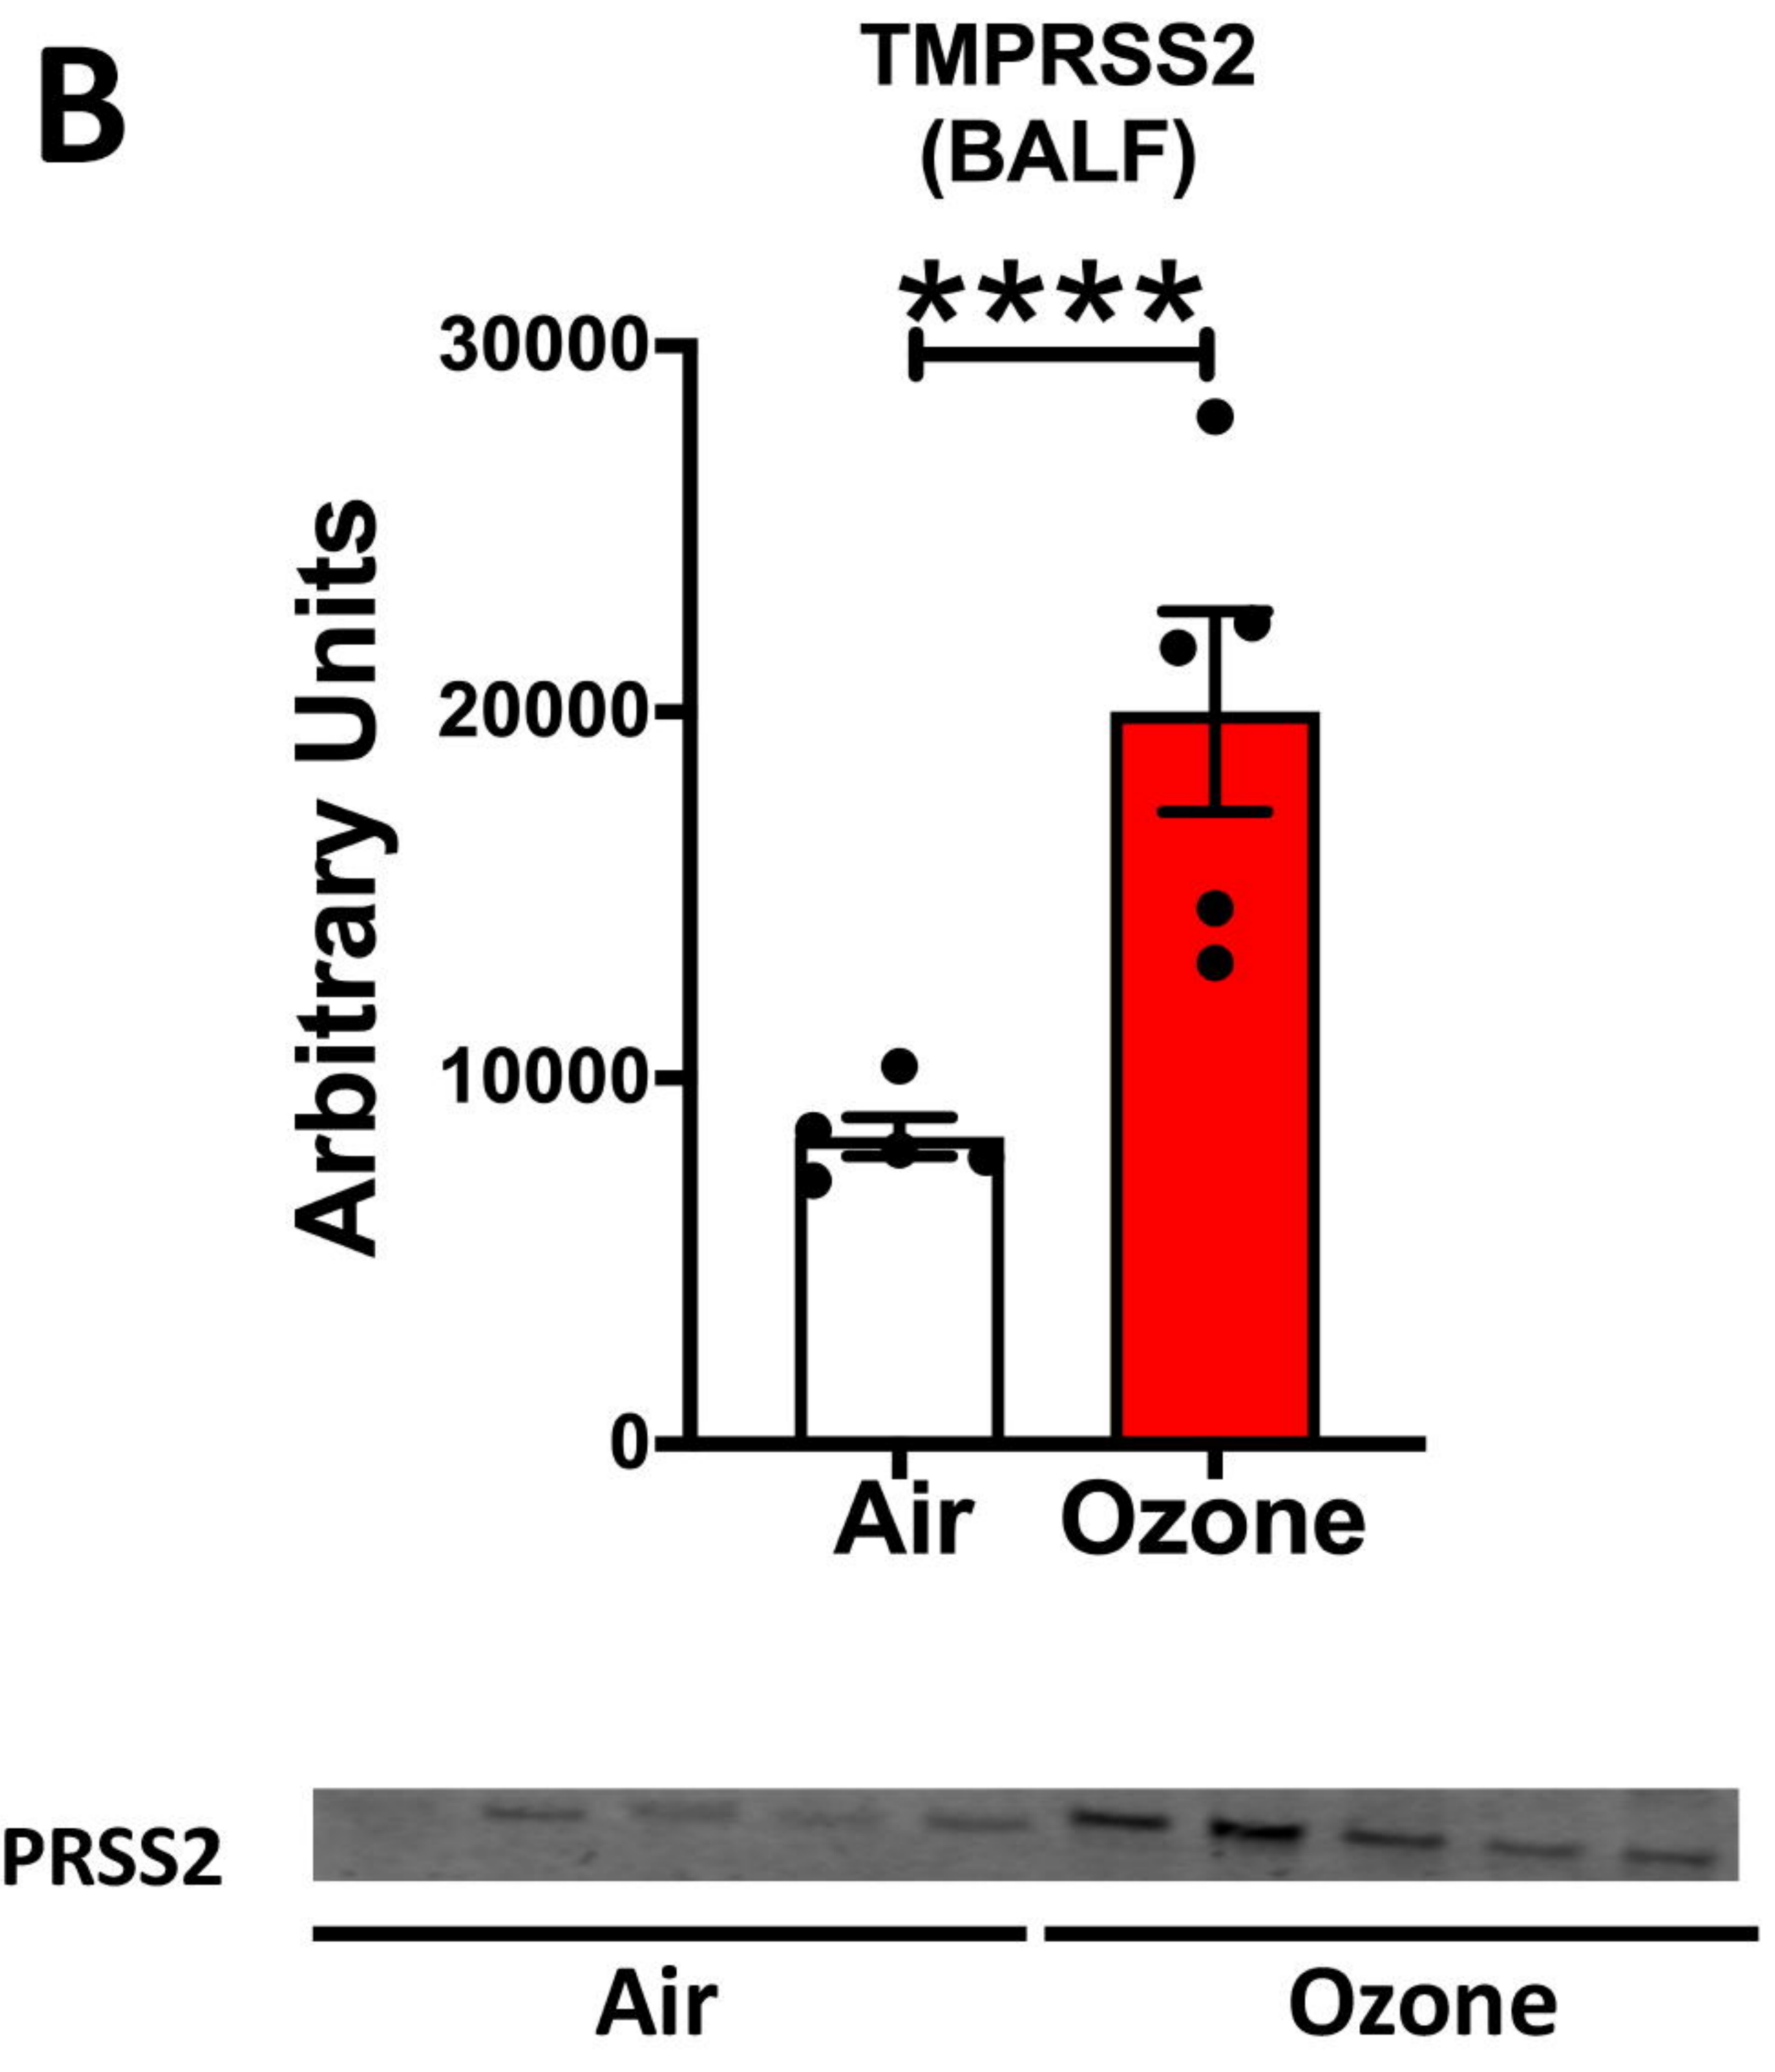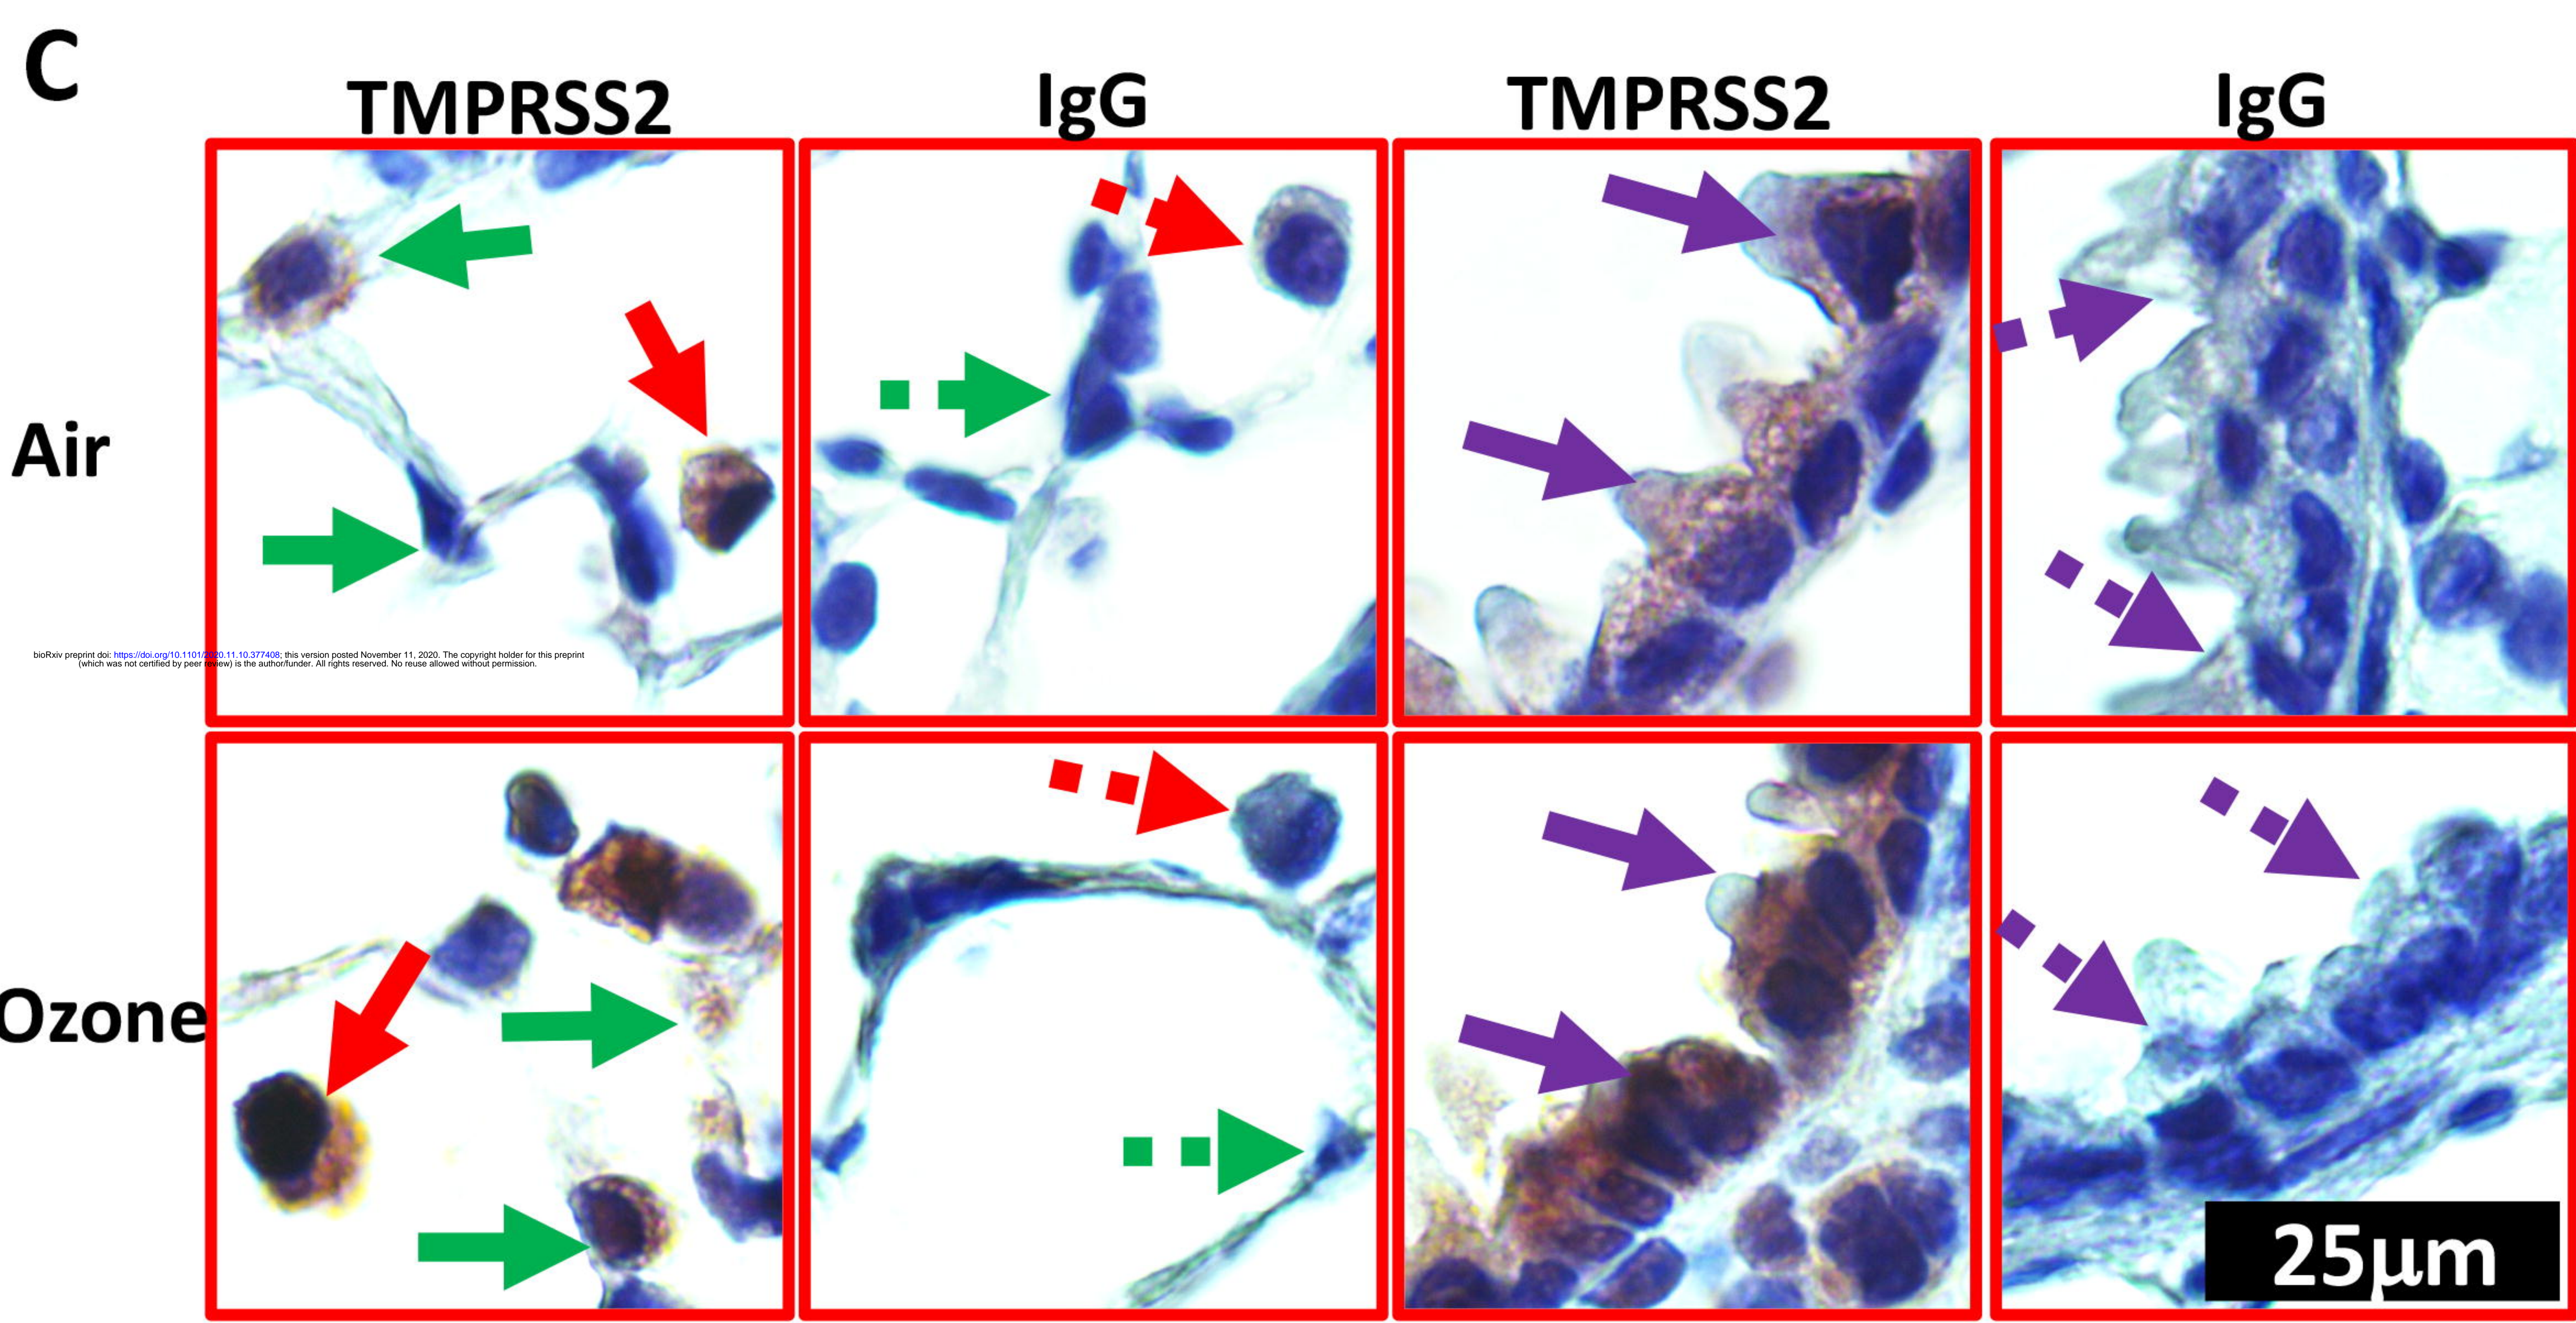

**Figure 1**

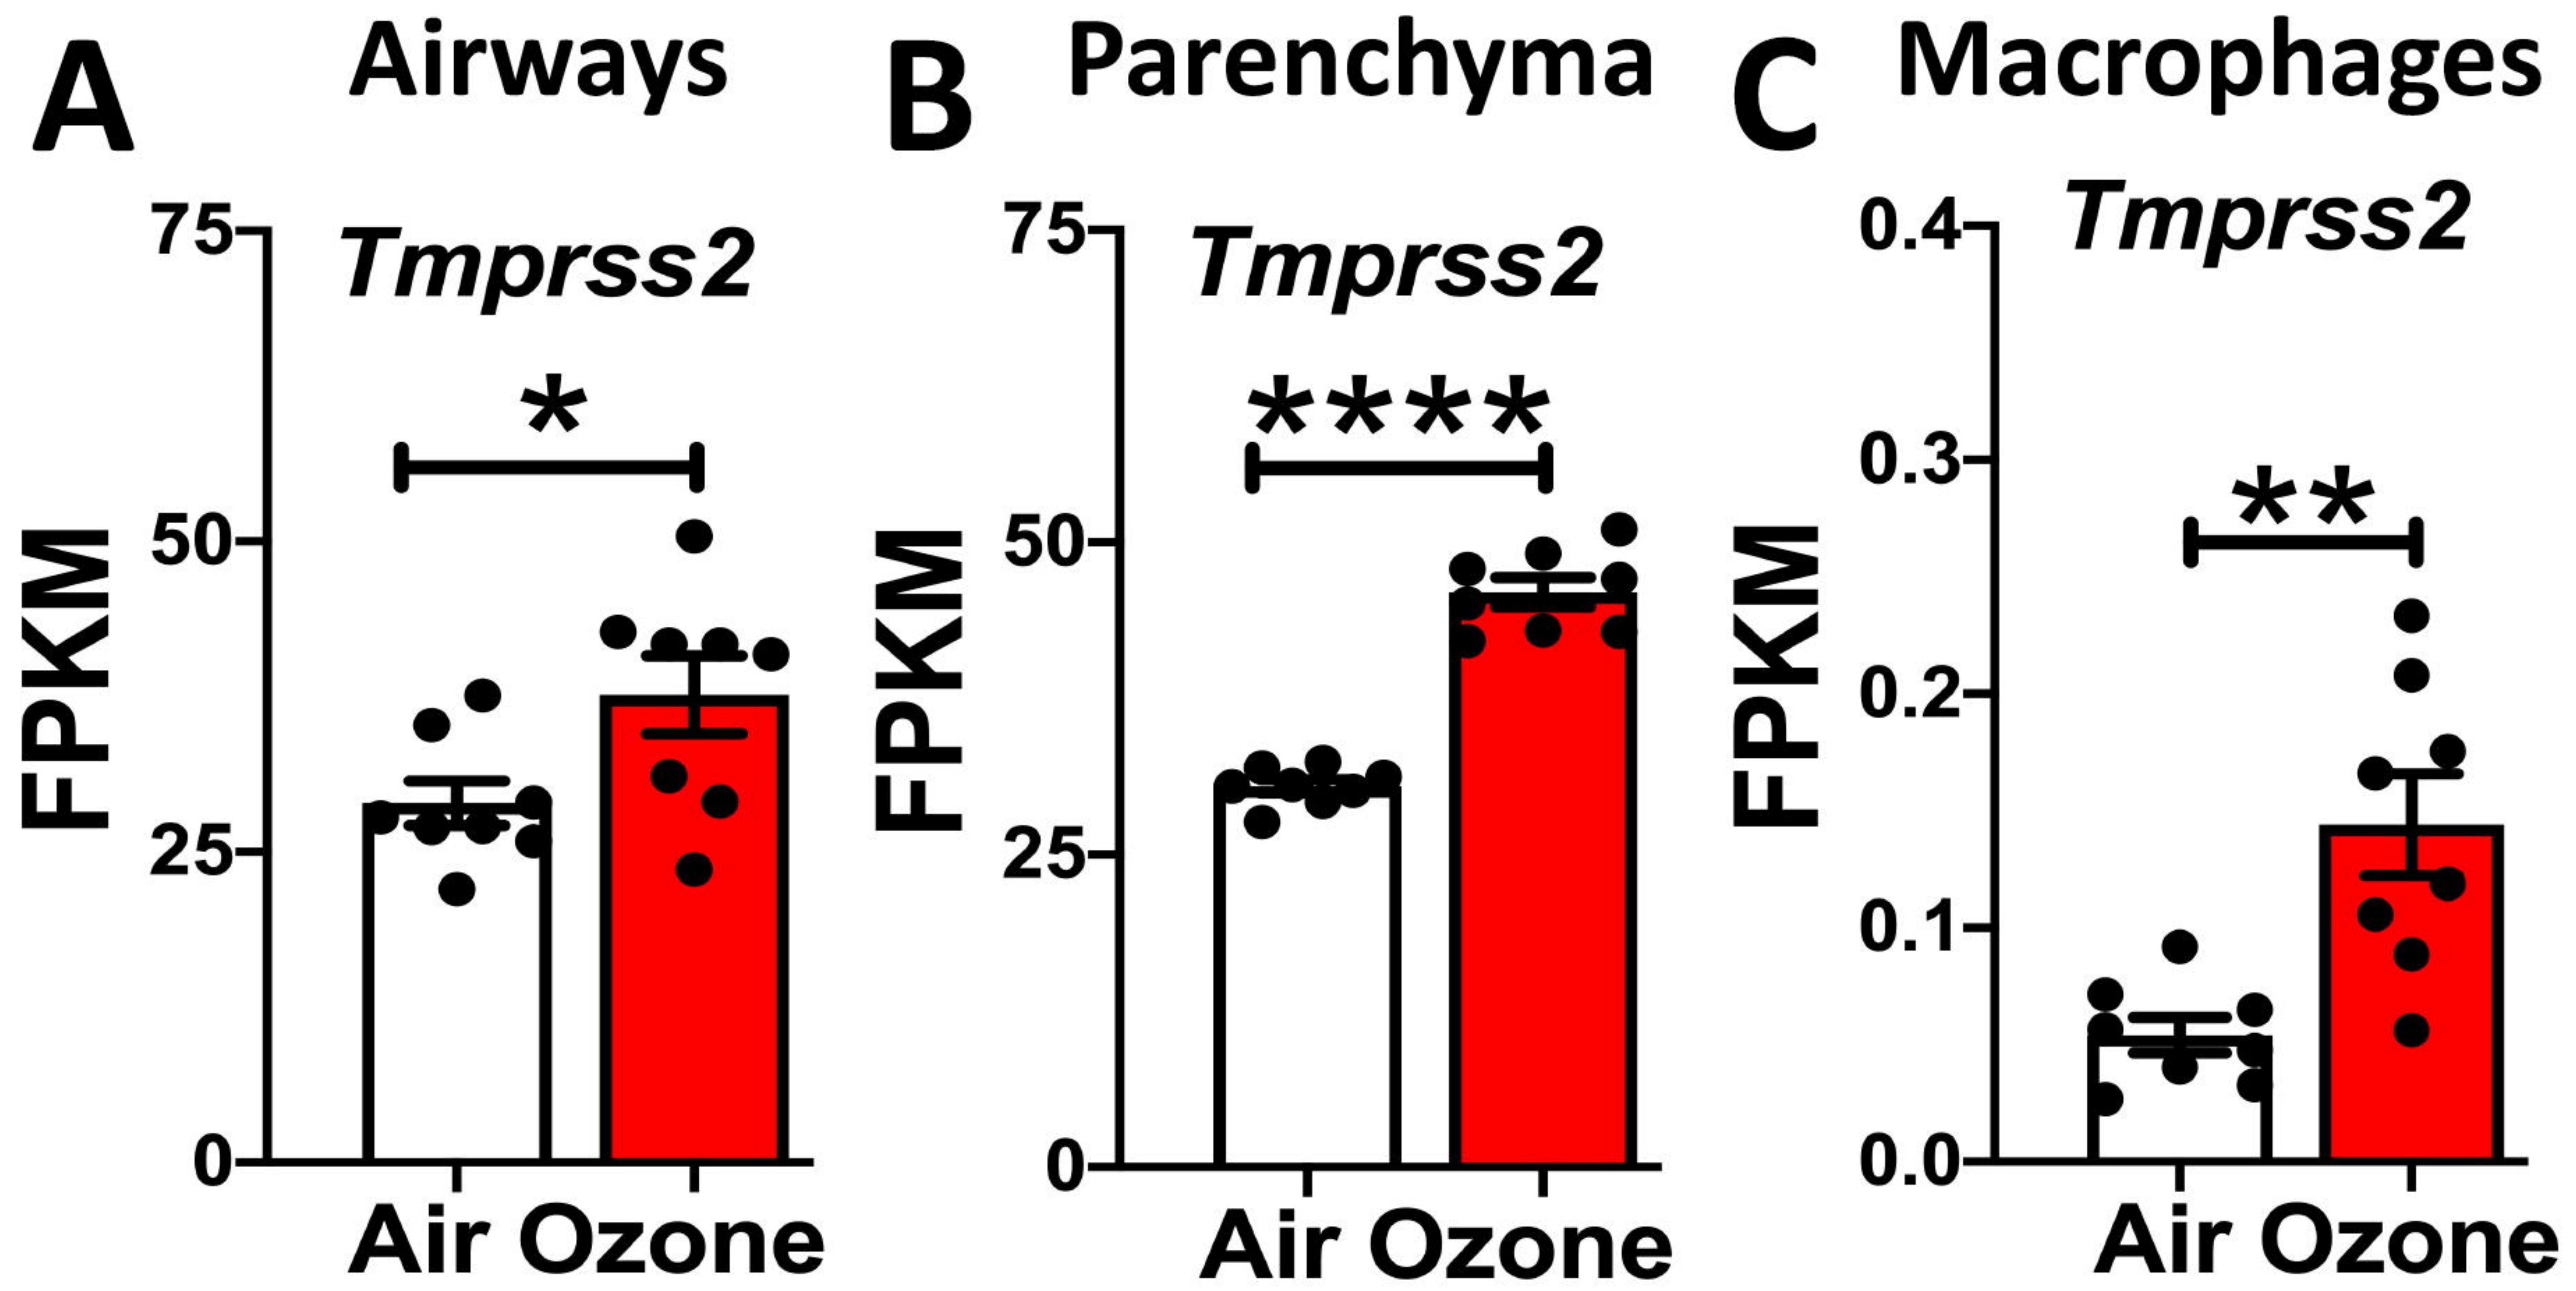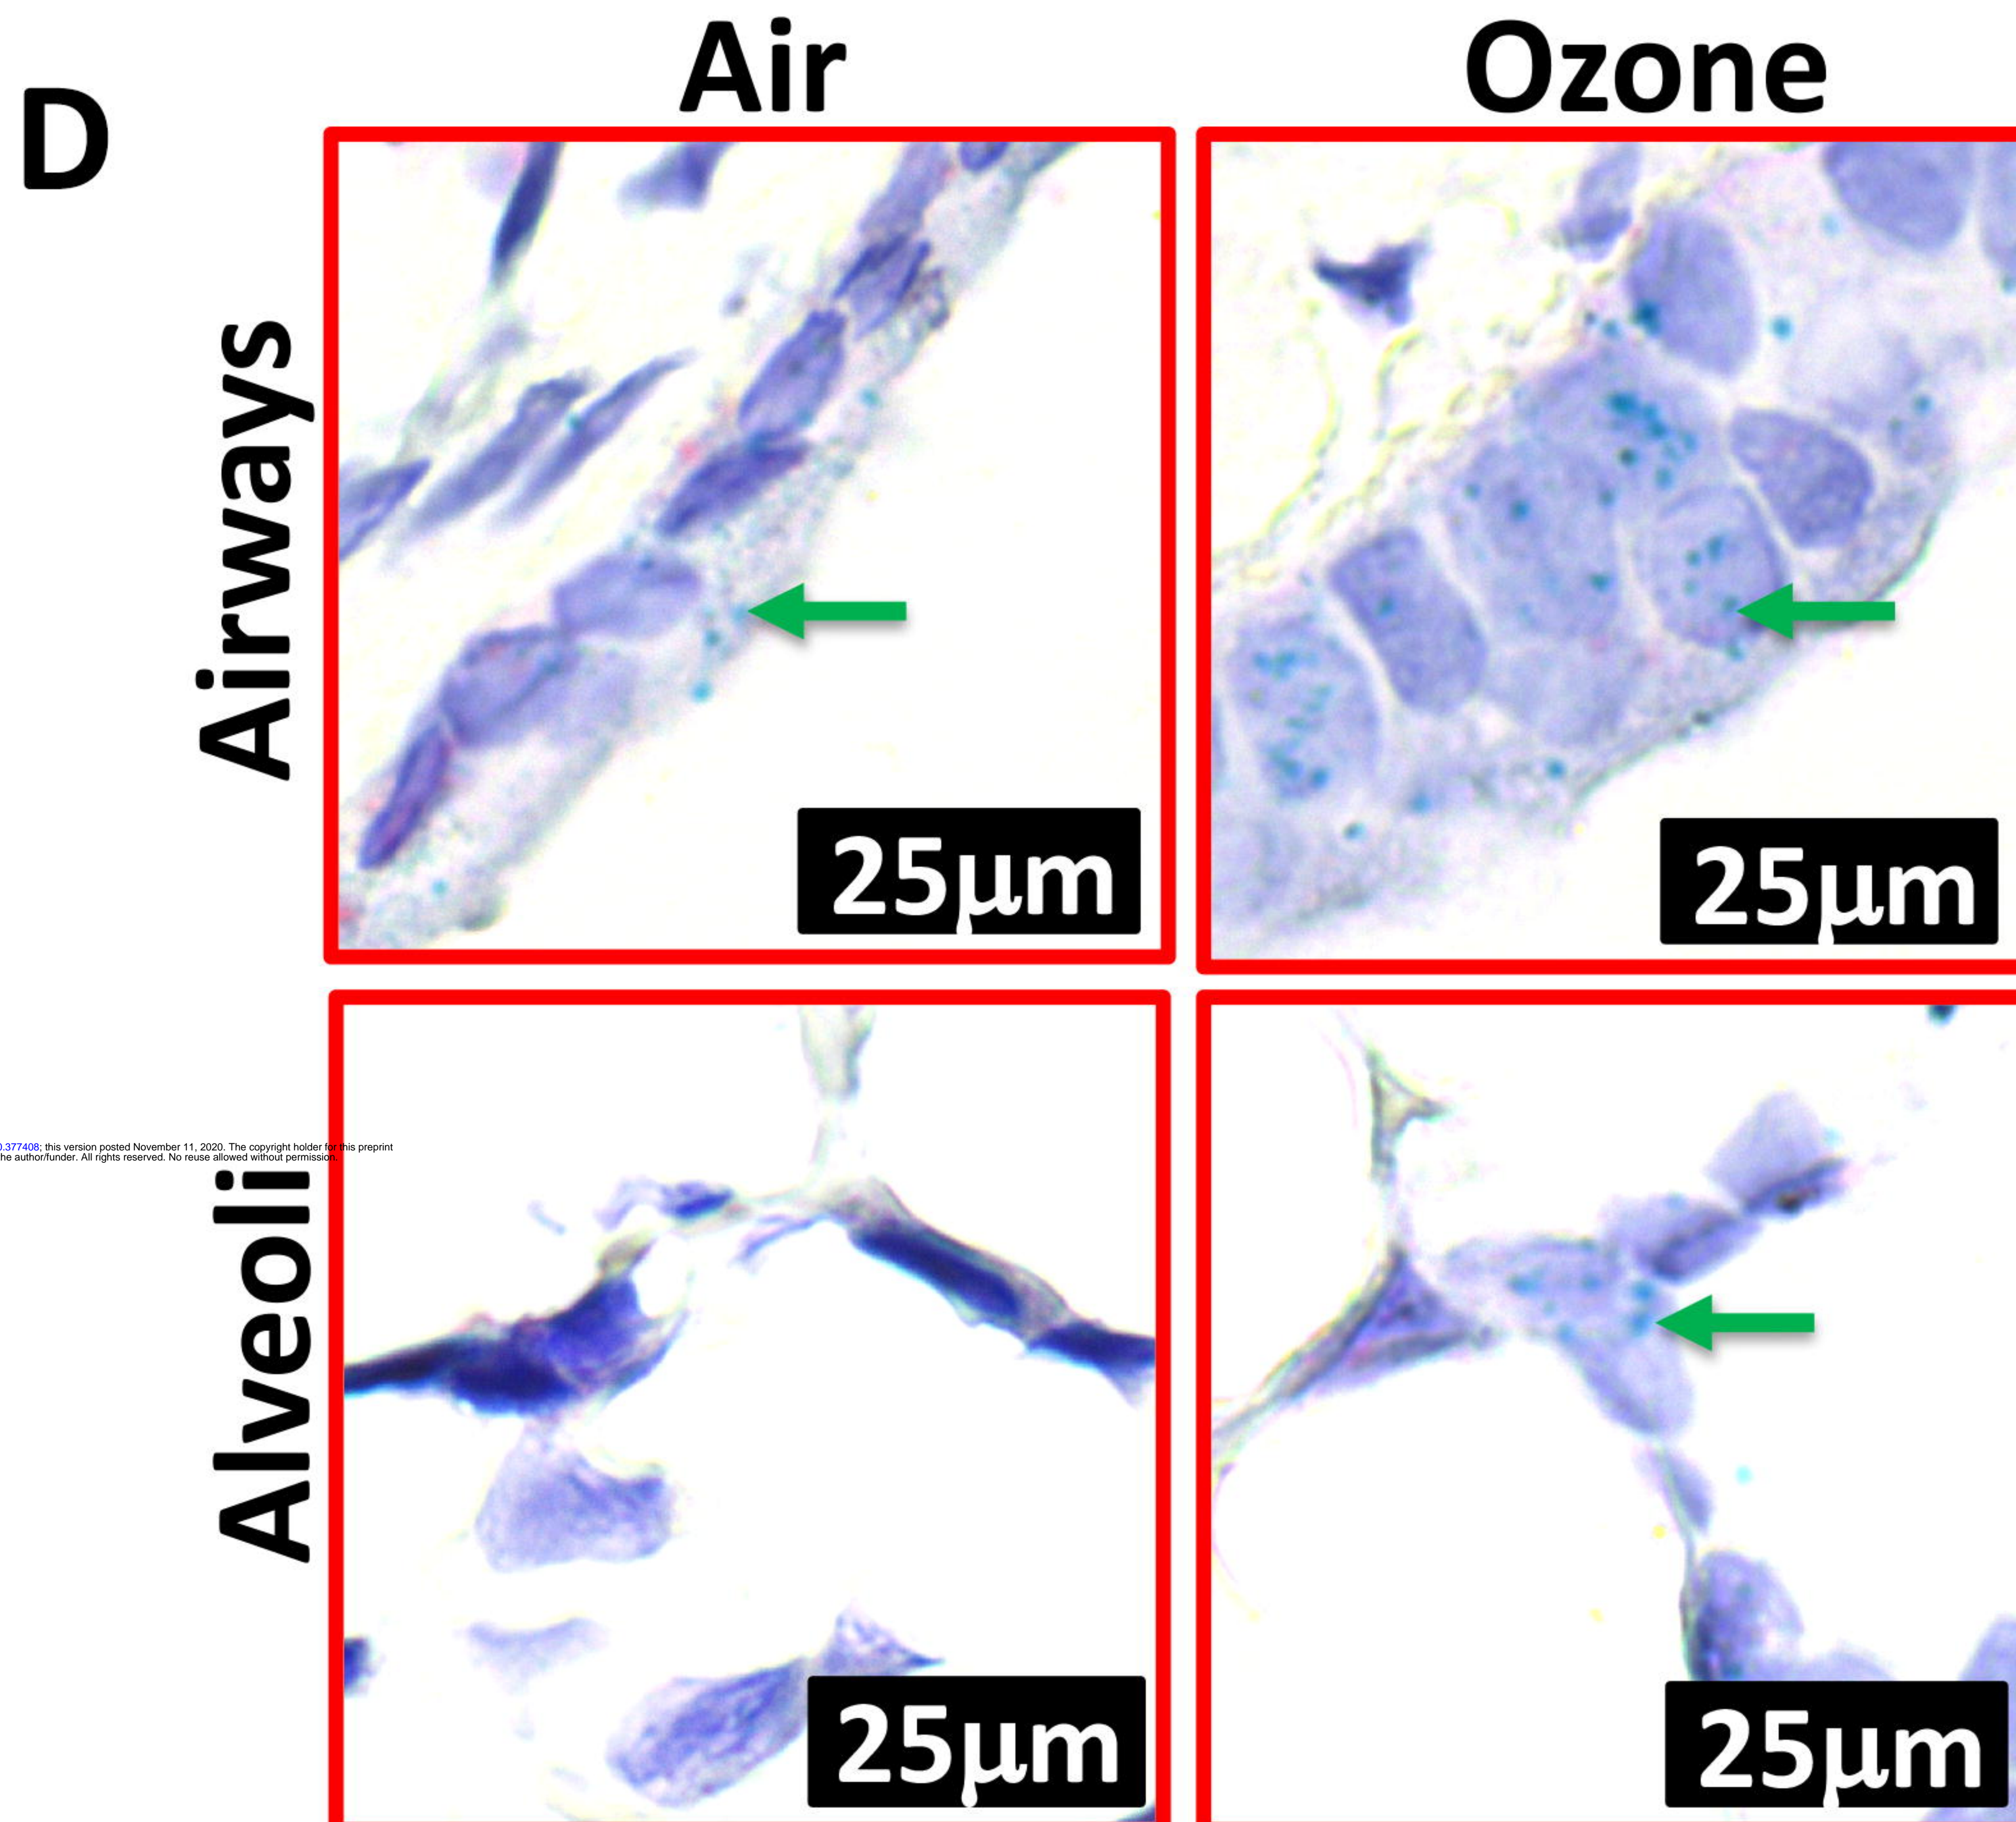

Figure 2

# A Airways

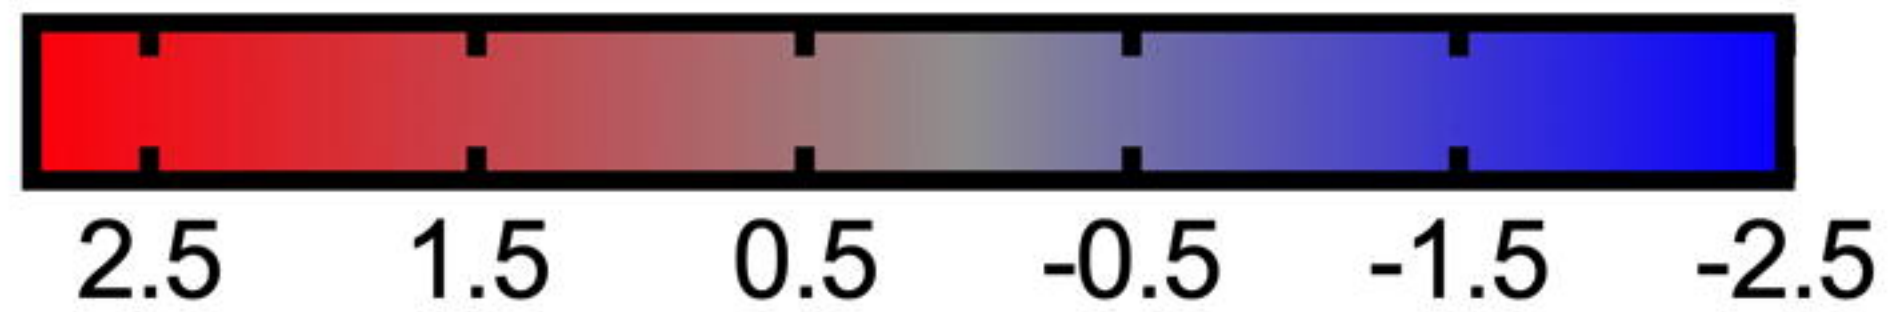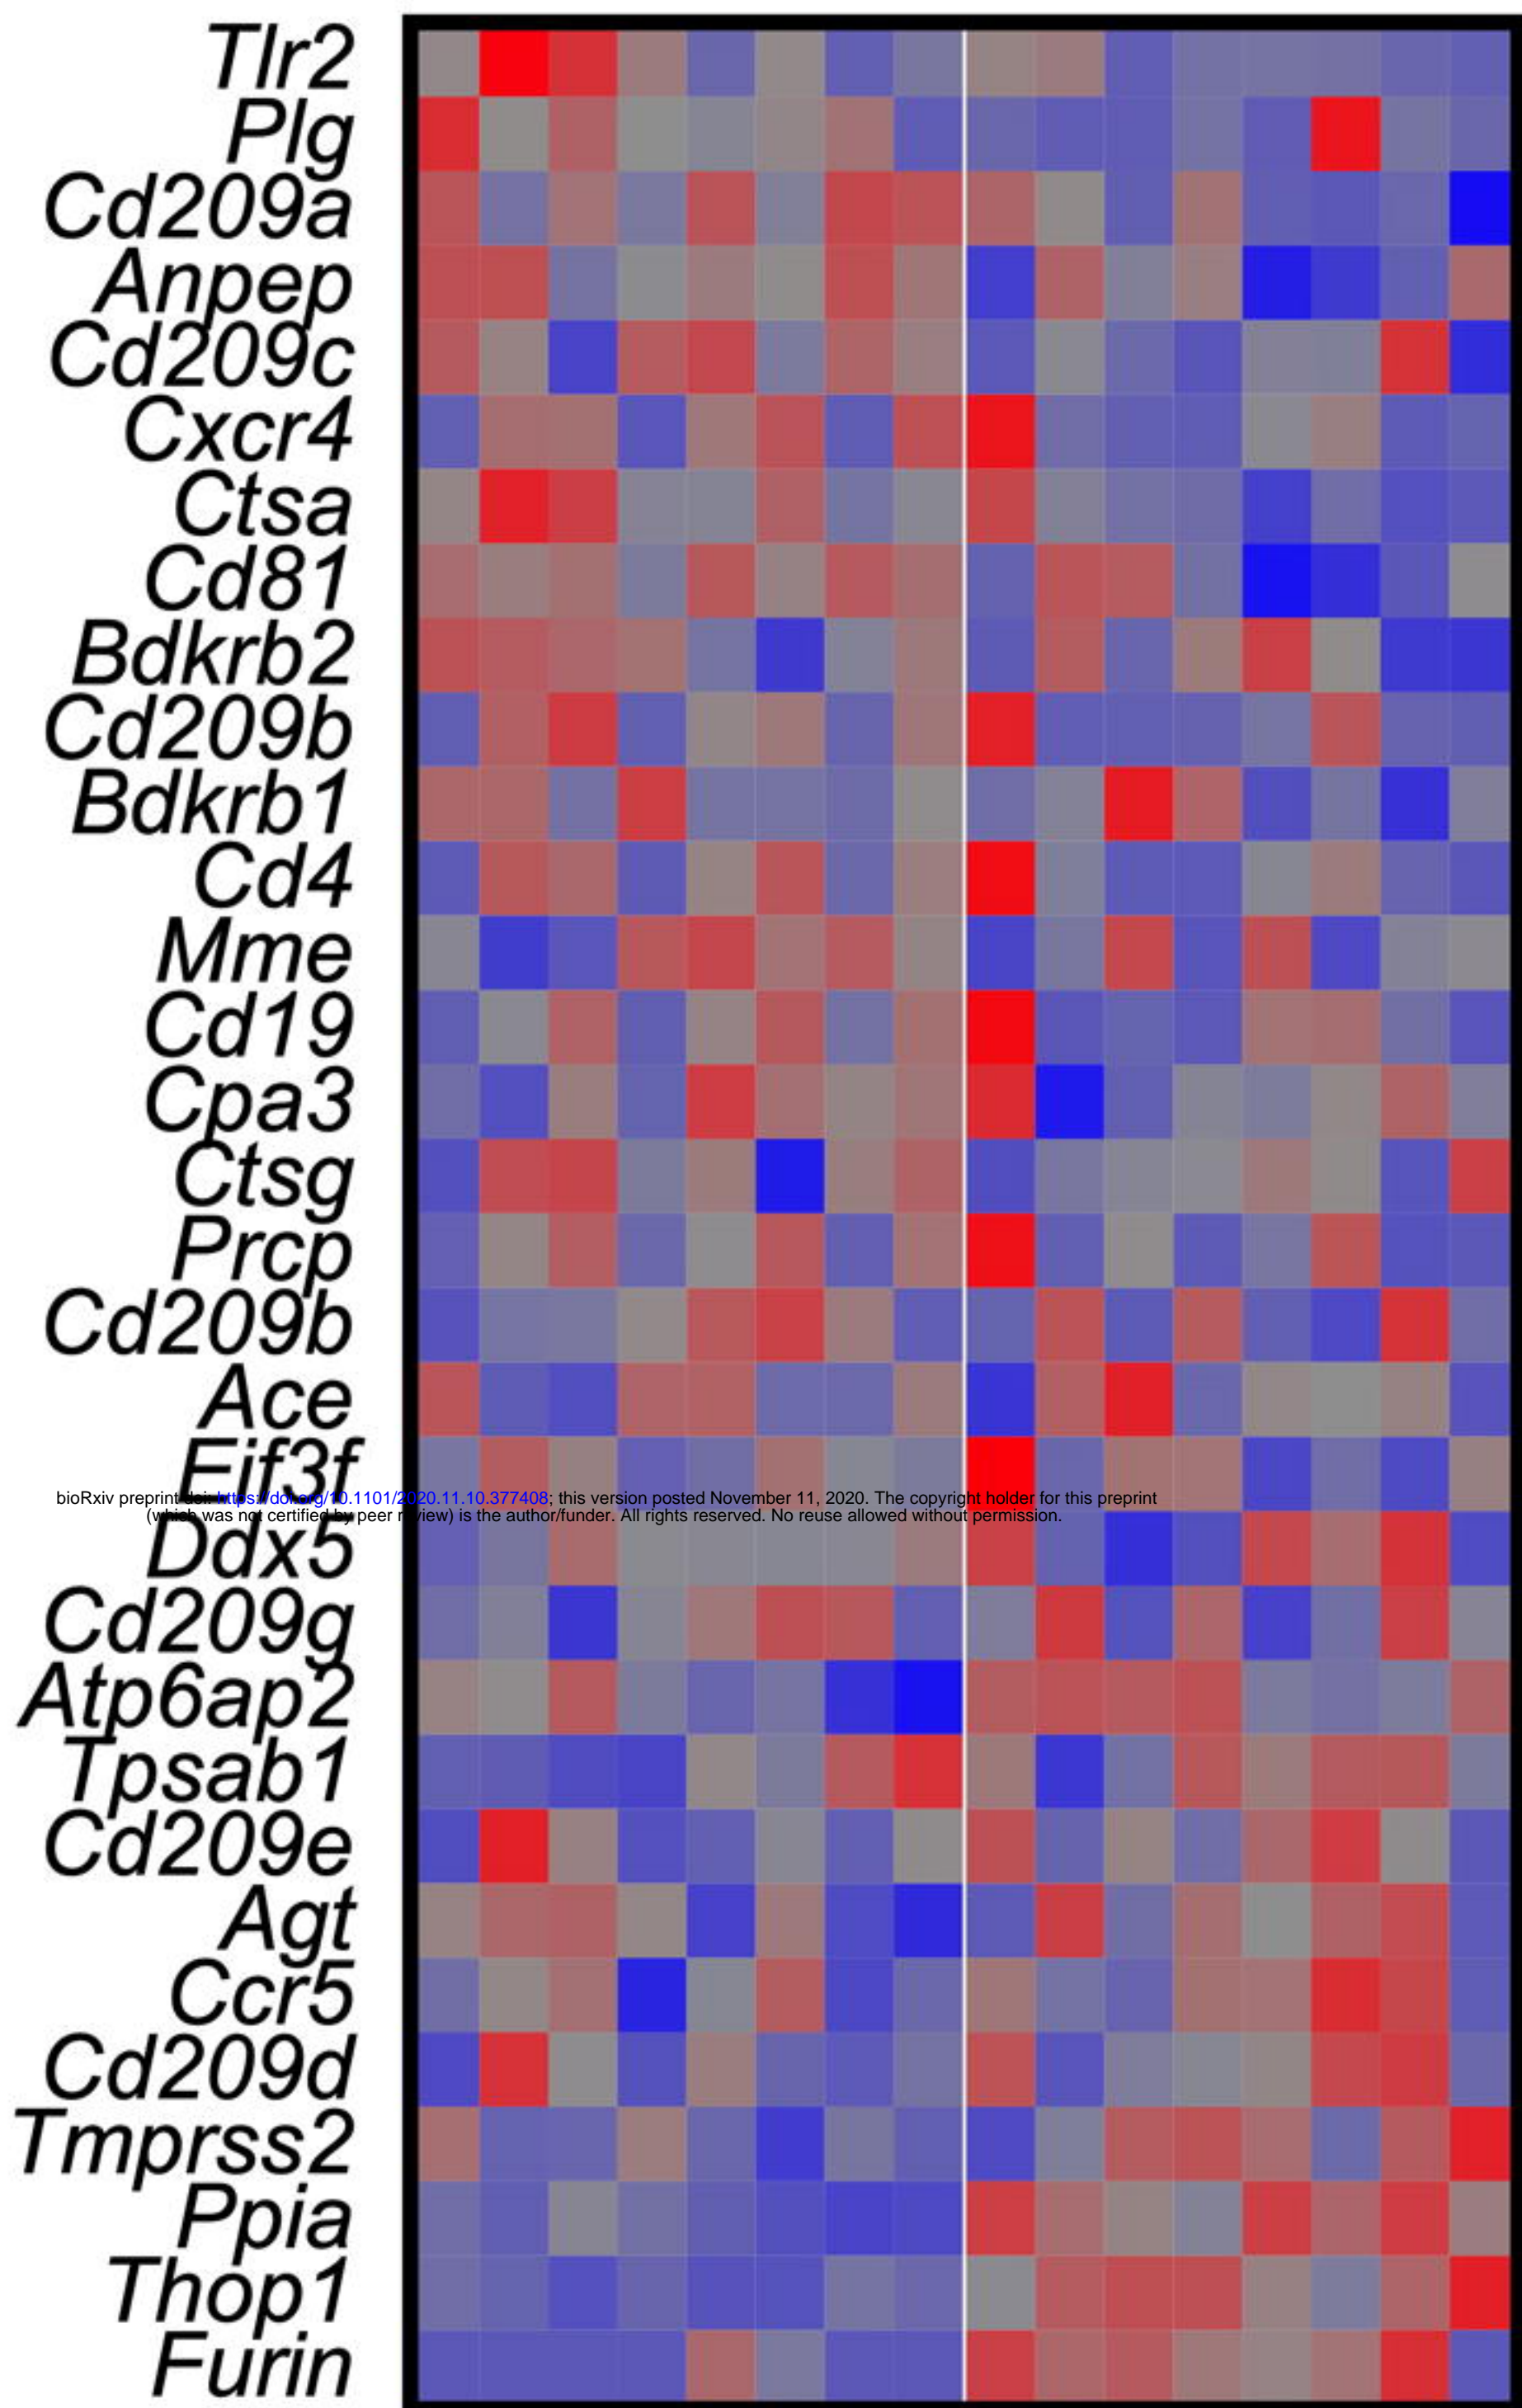

Air Ozone

# B Parenchyma

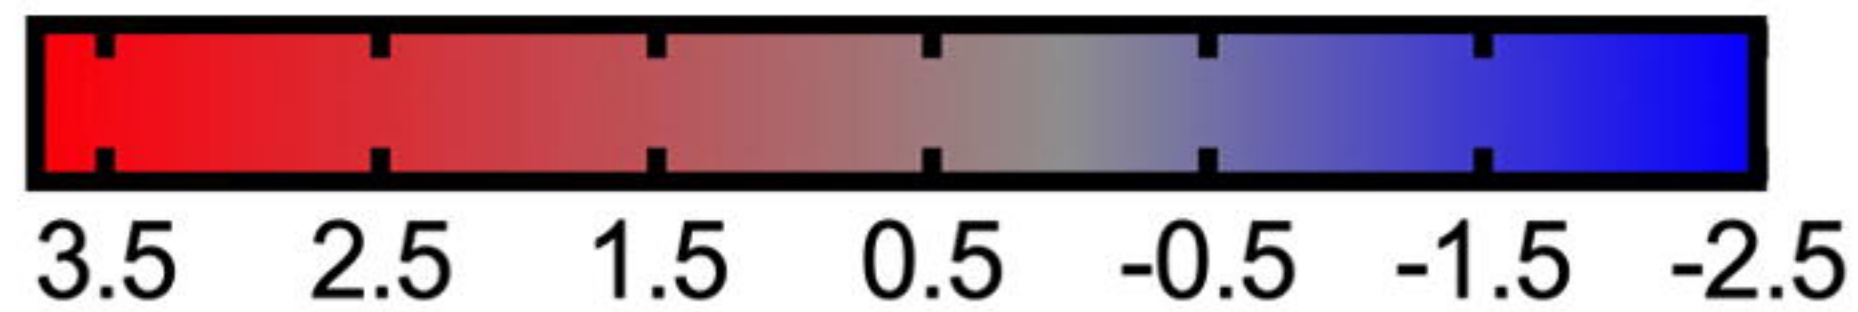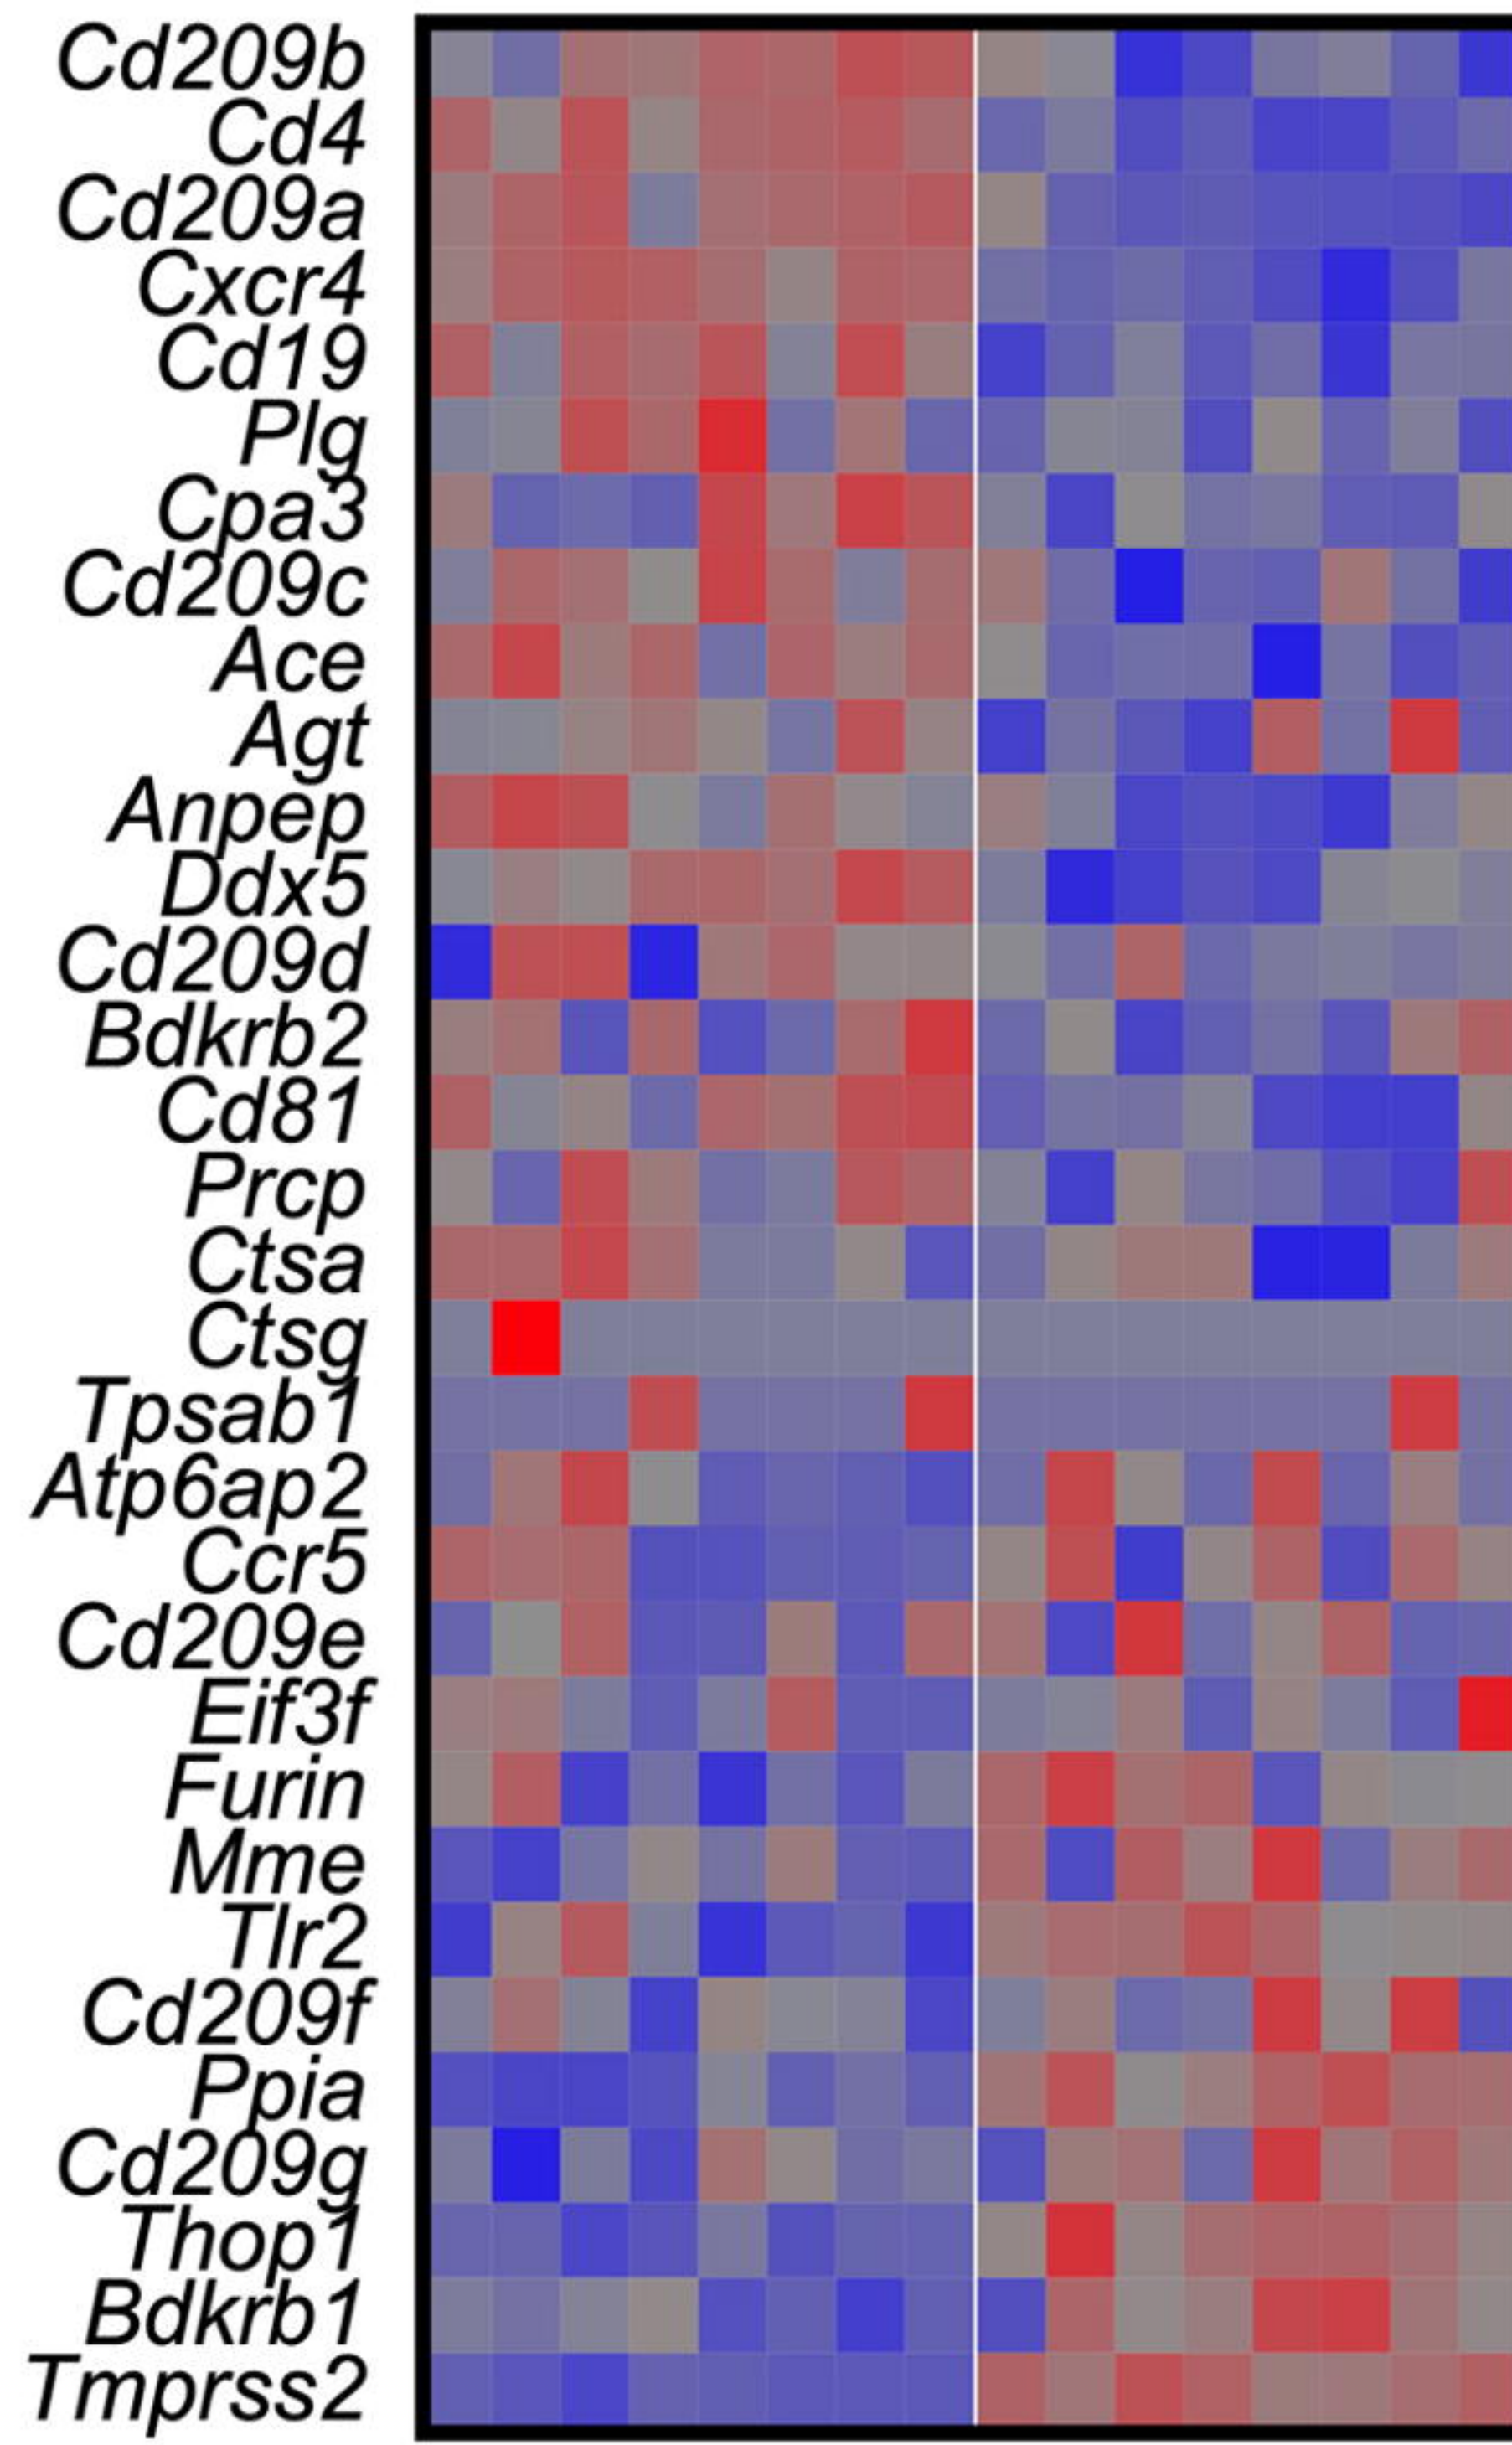

Air Ozone

# C Macrophages

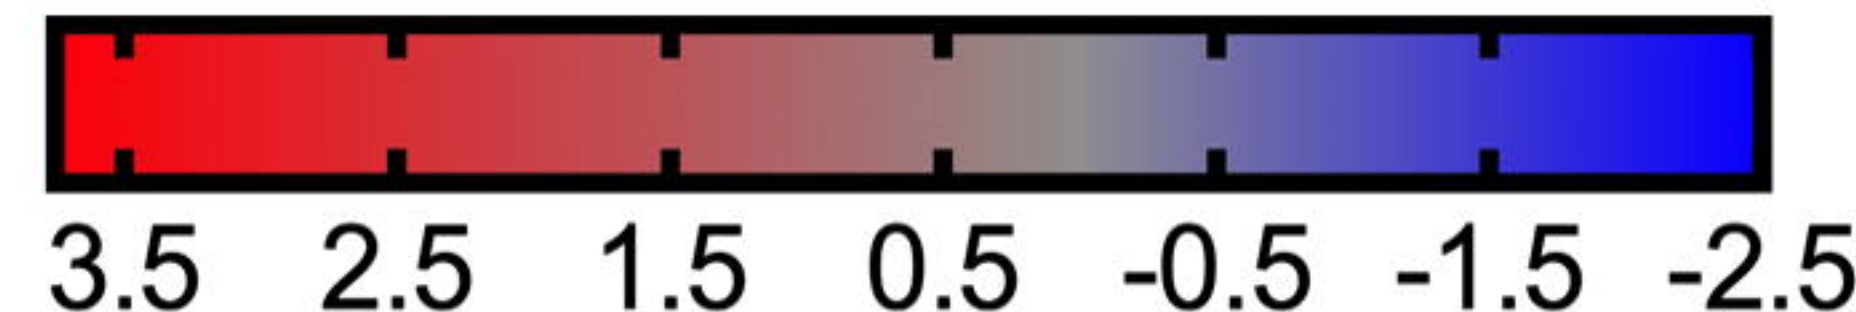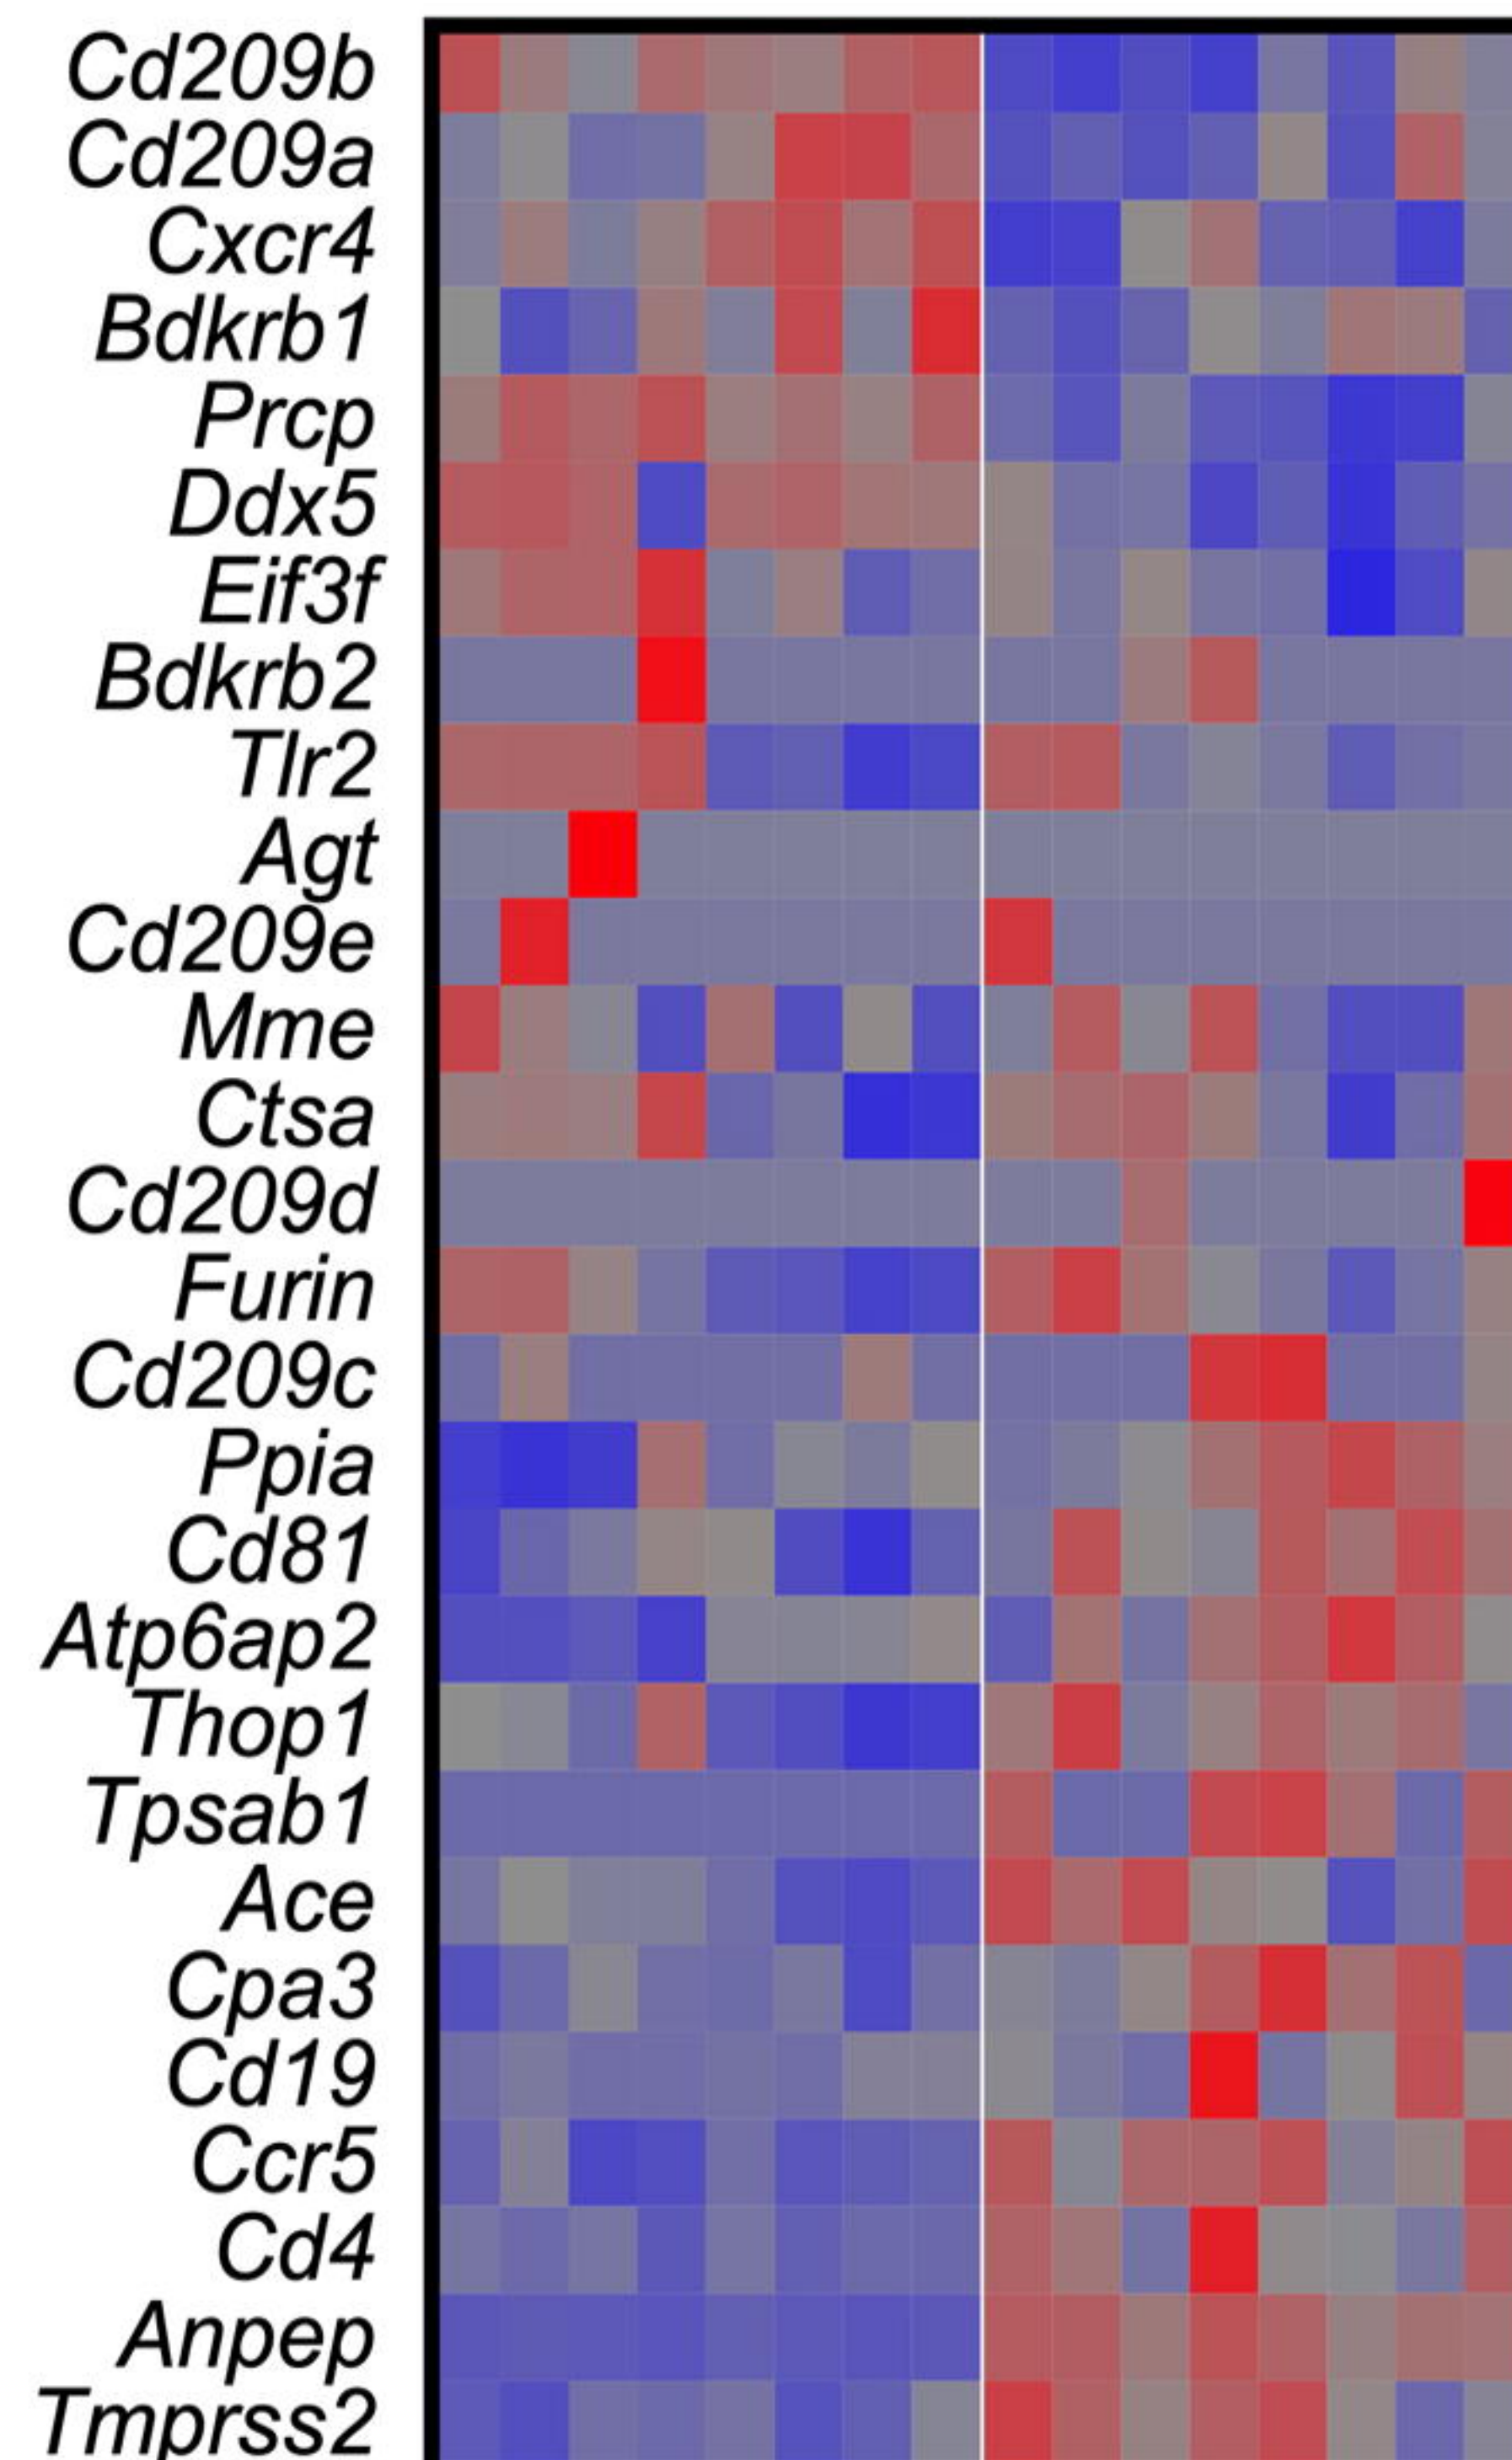

Air Ozone

bioRxiv preprint doi: <https://doi.org/10.1101/2020.11.10.377408>; this version posted November 11, 2020. The copyright holder for this preprint (which was not certified by peer review) is the author/funder. All rights reserved. No reuse allowed without permission.
